# Supplementary material for: Rapid and efficient syntheses of tryptophans using a continuous-flow quaternization–substitution reaction of gramines with a chiral nucleophilic glycine equivalent
Source: Royal Society of Chemistry journal article supplement (doi:10.1039/d2ob01682f), 2022-01-01

**Supporting Information**  
**for**

**Rapid and efficient syntheses of tryptophans using continuous-flow quaternization-substitution reaction of gramines with a chiral nucleophilic glycine equivalent**

Daichi Koiwa,<sup>a</sup> Masayuki Ohira,<sup>a</sup> Takahiro Hiramatsu,<sup>a</sup> Hidenori Abe,<sup>a</sup> Tetsuji Kawamoto,<sup>a,\*</sup> Yuji Ishihara,<sup>a</sup> Bernardo Ignacio,<sup>b</sup> Noel Mansour,<sup>b</sup> Todd Romoff<sup>b</sup>

<sup>a</sup>*Research & Development Division, Hamari Chemicals, Ltd. 1-19-40, Nankokita, Suminoe-ku, Osaka, 559-0034, Japan*

<sup>b</sup>*Hamari Chemicals USA, Inc. 11558 Sorrento Valley Rd Suite 3, San Diego, California, 92121, USA*

**Table of contents**

|                                                                                                   |           |
|---------------------------------------------------------------------------------------------------|-----------|
| Copies of <sup>1</sup> H and <sup>13</sup> C NMR spectra of compounds <b>3b</b> – <b>3j</b> ..... | S2 - S10  |
| Copies of <sup>1</sup> H and <sup>13</sup> C NMR spectra of compound <b>4h</b> .....              | S11       |
| HPLC spectra for ee determination of compounds <b>4a</b> – <b>4j</b> .....                        | S12 – S23 |
| Details of continuous-flow reaction systems in Tables 5 and 6.....                                | S24 - 25  |

<sup>1</sup>H NMR spectrum of 3b (500 MHz, DMSO-d<sub>6</sub>)

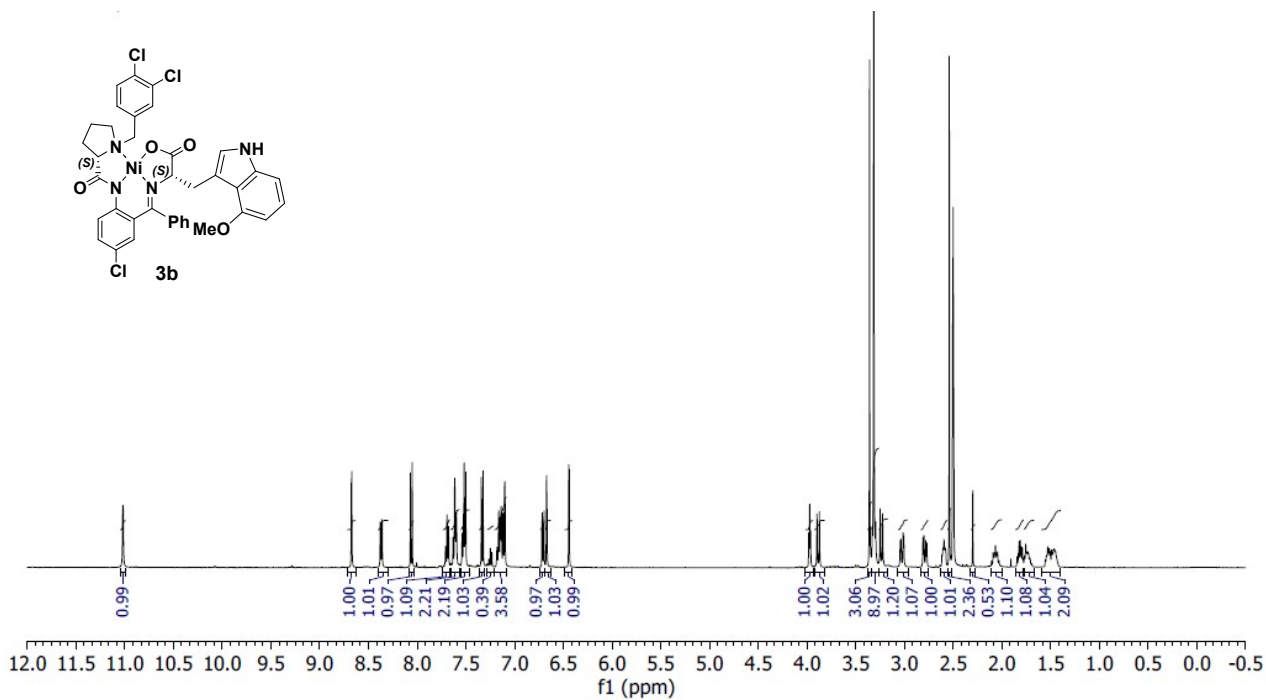

<sup>13</sup>C NMR spectrum of 3b (125 MHz, DMSO-d<sub>6</sub>)

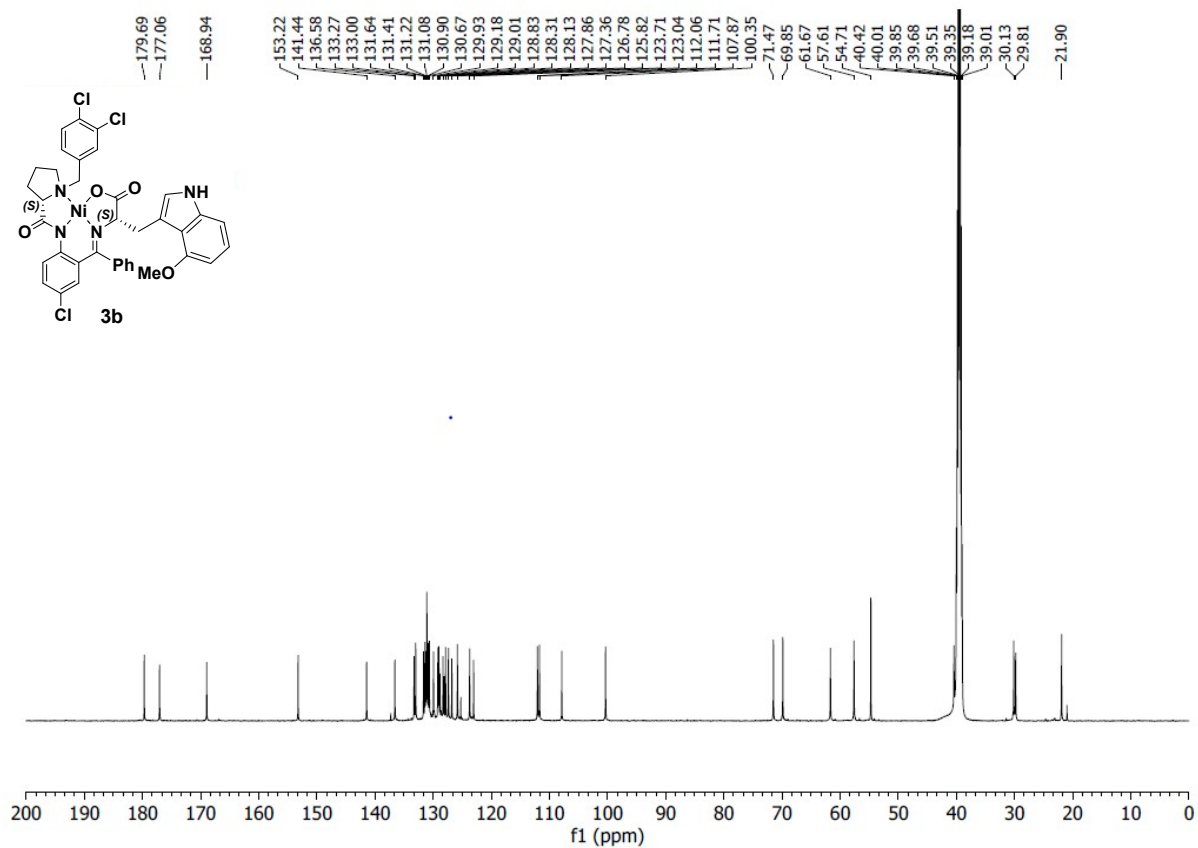

**<sup>1</sup>H NMR spectrum of 3c (500 MHz, DMSO-*d*<sub>6</sub>)**

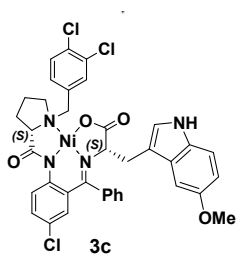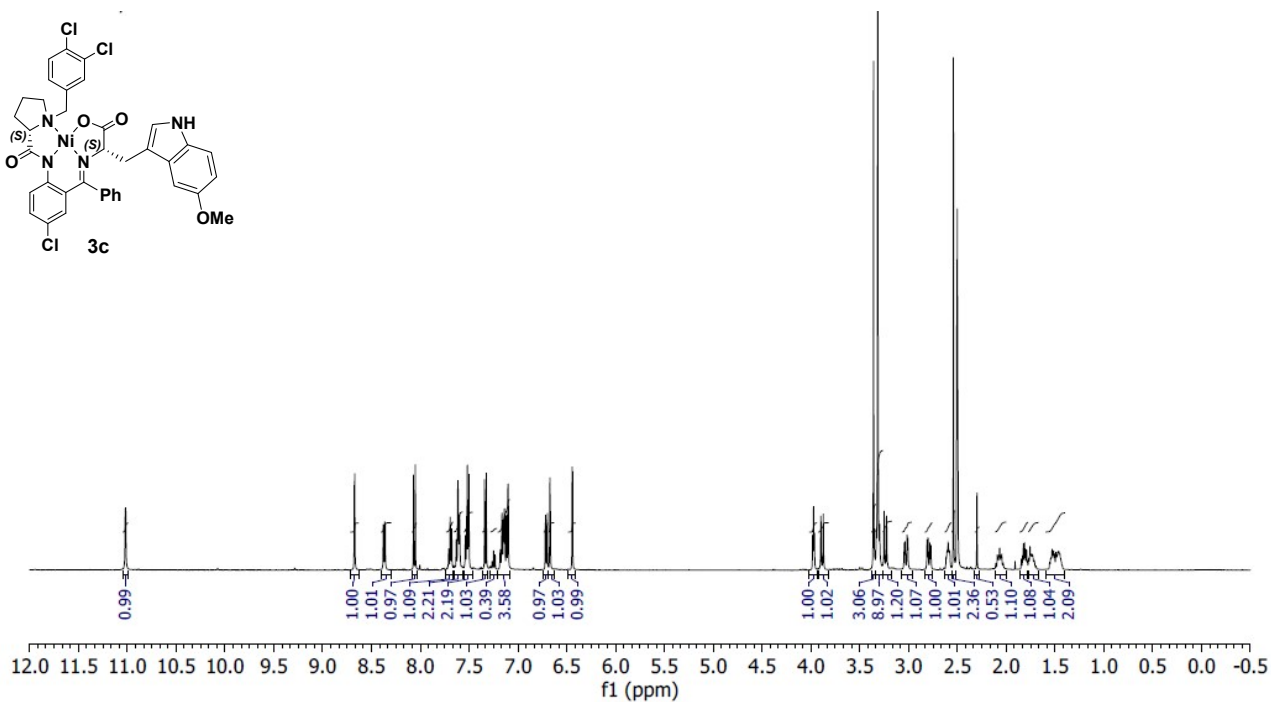

**<sup>13</sup>C NMR spectrum of 3c (126 MHz, DMSO-*d*<sub>6</sub>)**

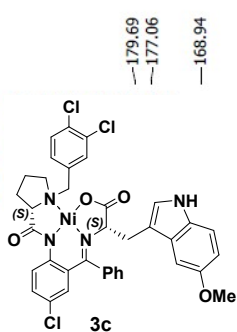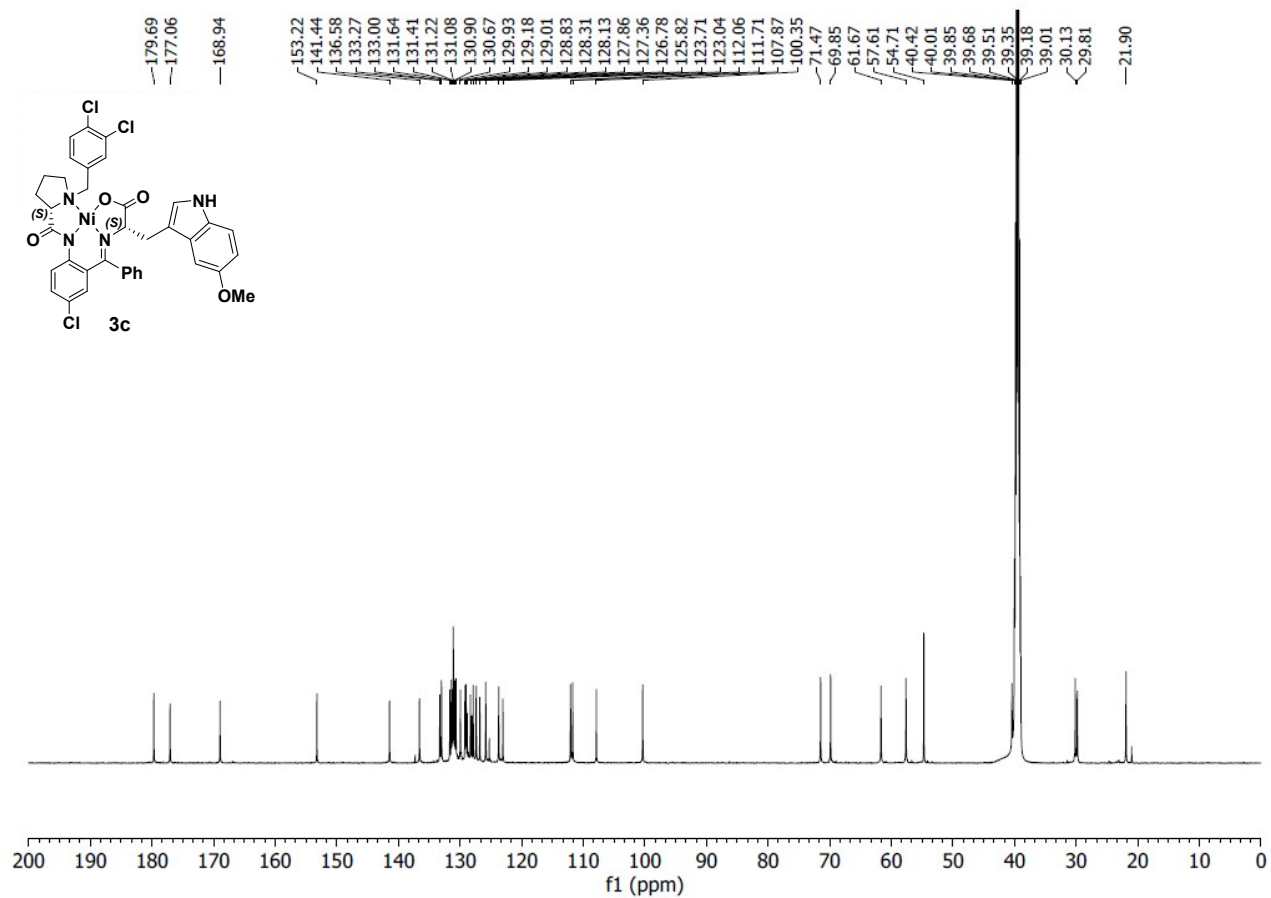

<sup>1</sup>H NMR spectrum of 3d (400 MHz, DMSO-*d*<sub>6</sub>)

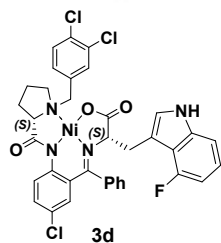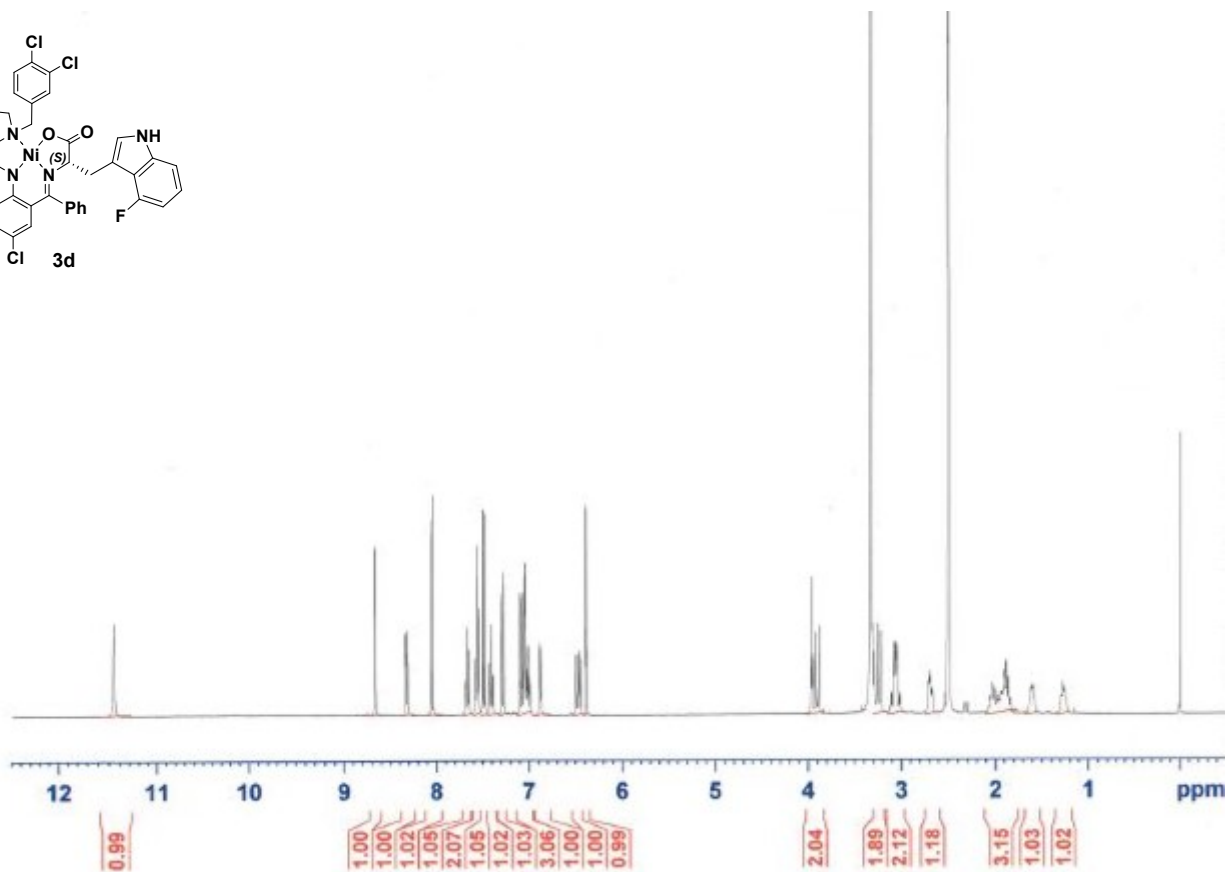

<sup>13</sup>C NMR spectrum of 3d (126 MHz, DMSO-*d*<sub>6</sub>)

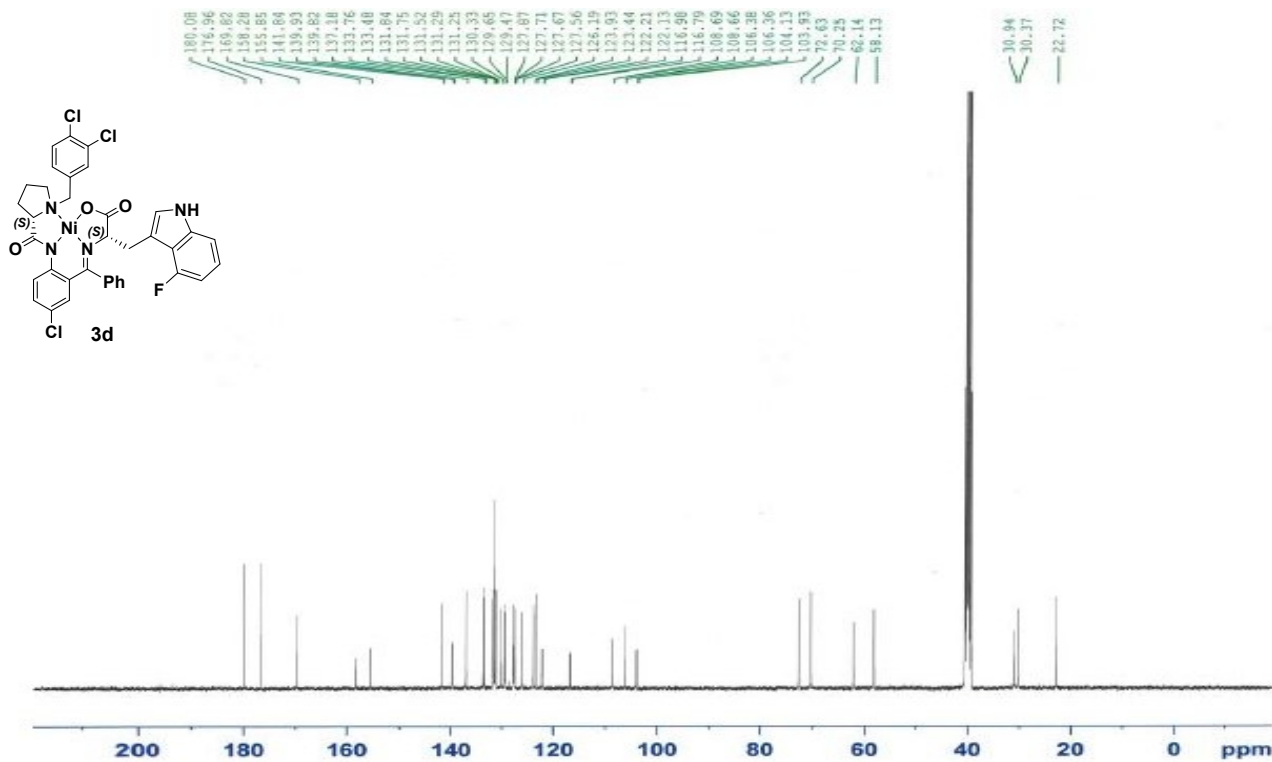

<sup>1</sup>H NMR spectrum of 3e (500 MHz, DMSO-d<sub>6</sub>)

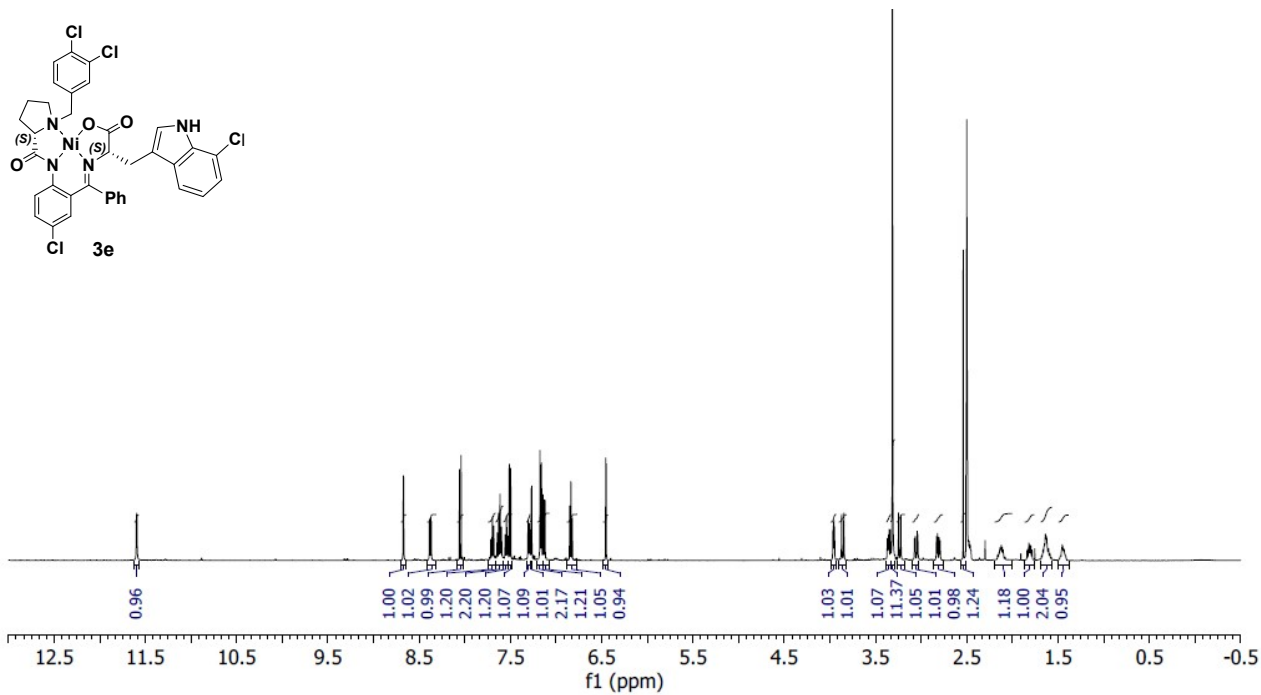

<sup>13</sup>C NMR spectrum of 3e (126 MHz, DMSO-d<sub>6</sub>)

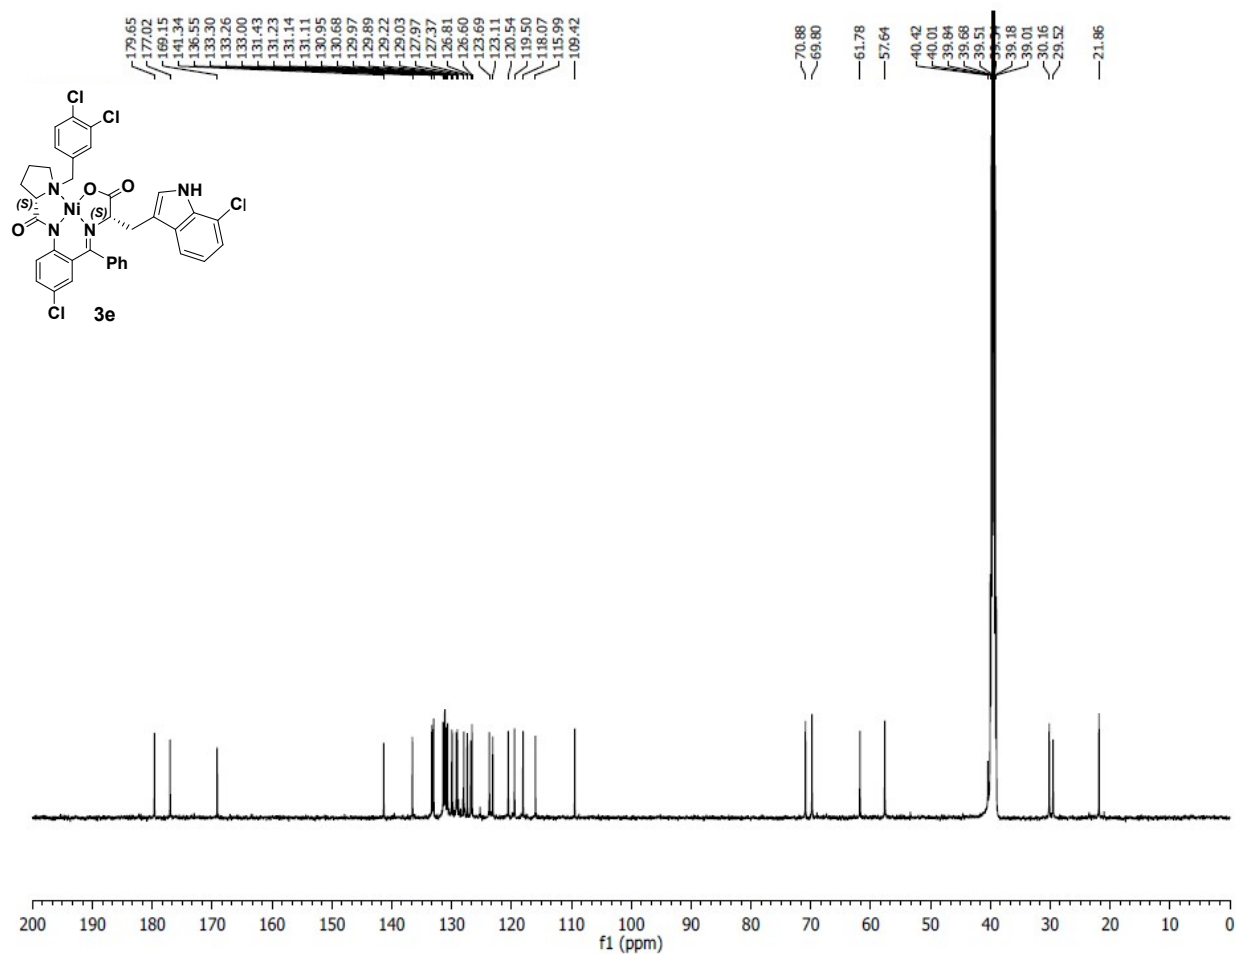

<sup>1</sup>H NMR spectrum of 3f (400 MHz, DMSO-*d*<sub>6</sub>)

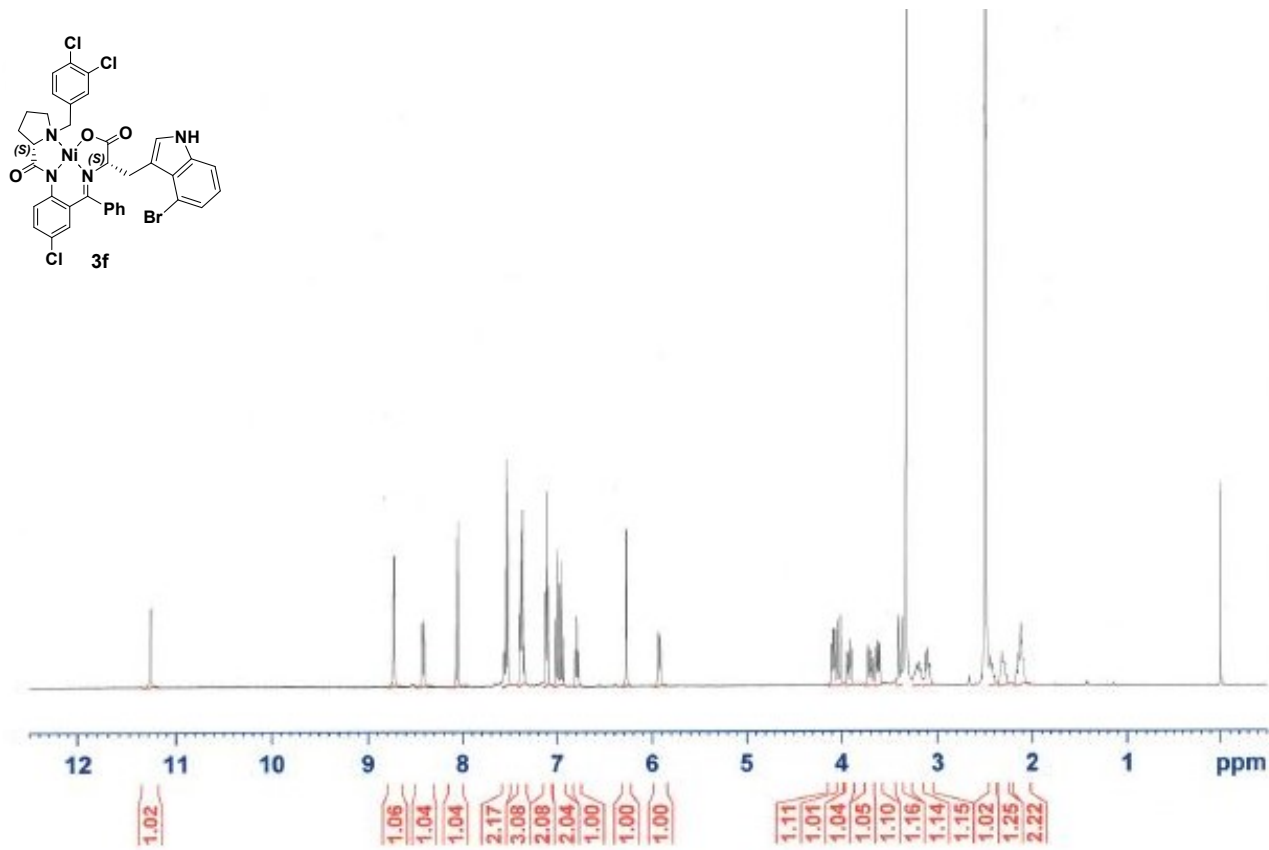

<sup>13</sup>C NMR spectrum of 3f (100 MHz, DMSO-*d*<sub>6</sub>)

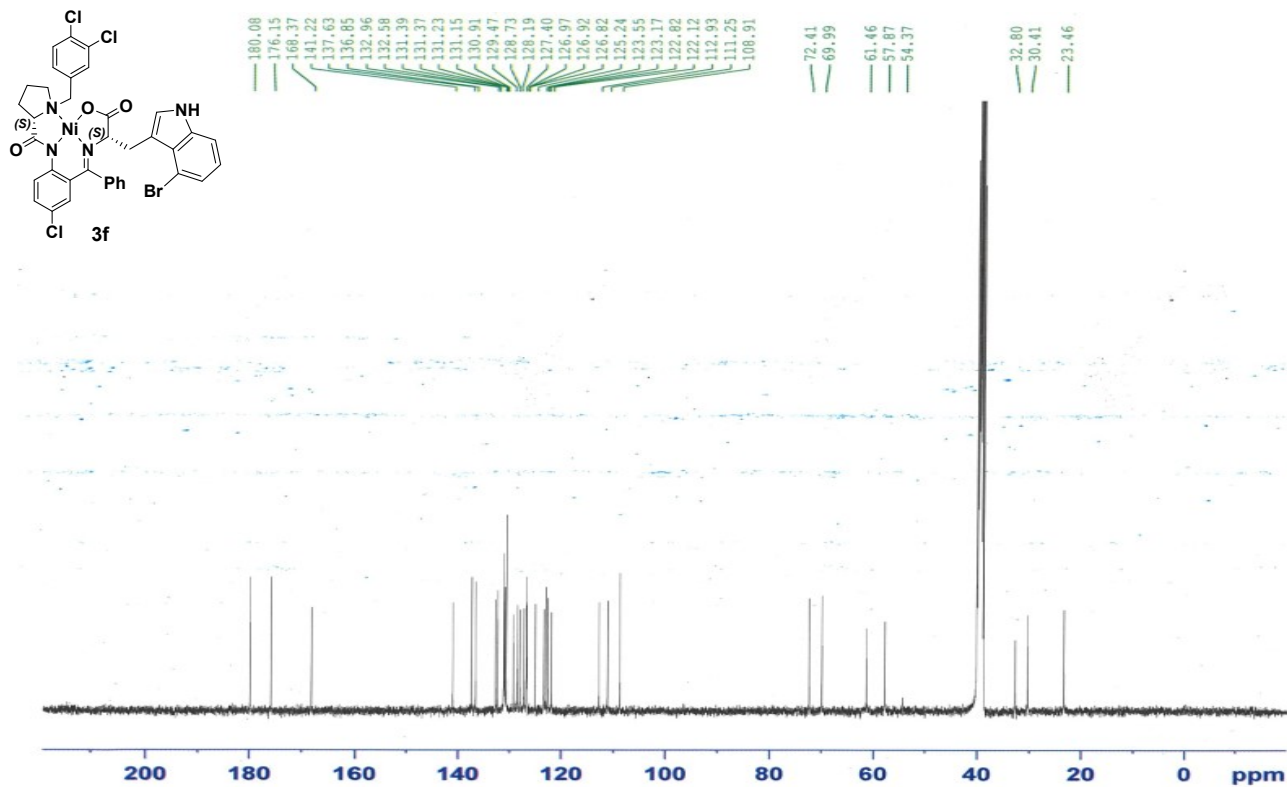

<sup>1</sup>H NMR spectrum of 3g (500 MHz, DMSO-d<sub>6</sub>)

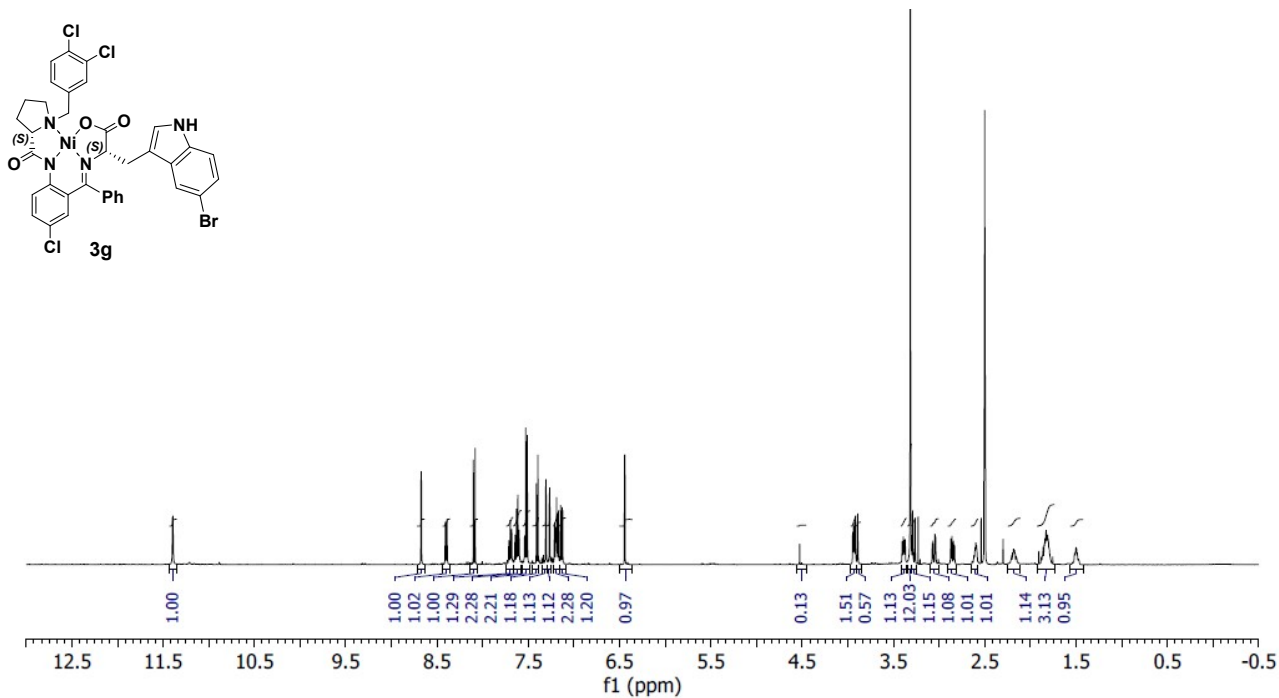

<sup>13</sup>C NMR spectrum of 3g (125 MHz, DMSO-d<sub>6</sub>)

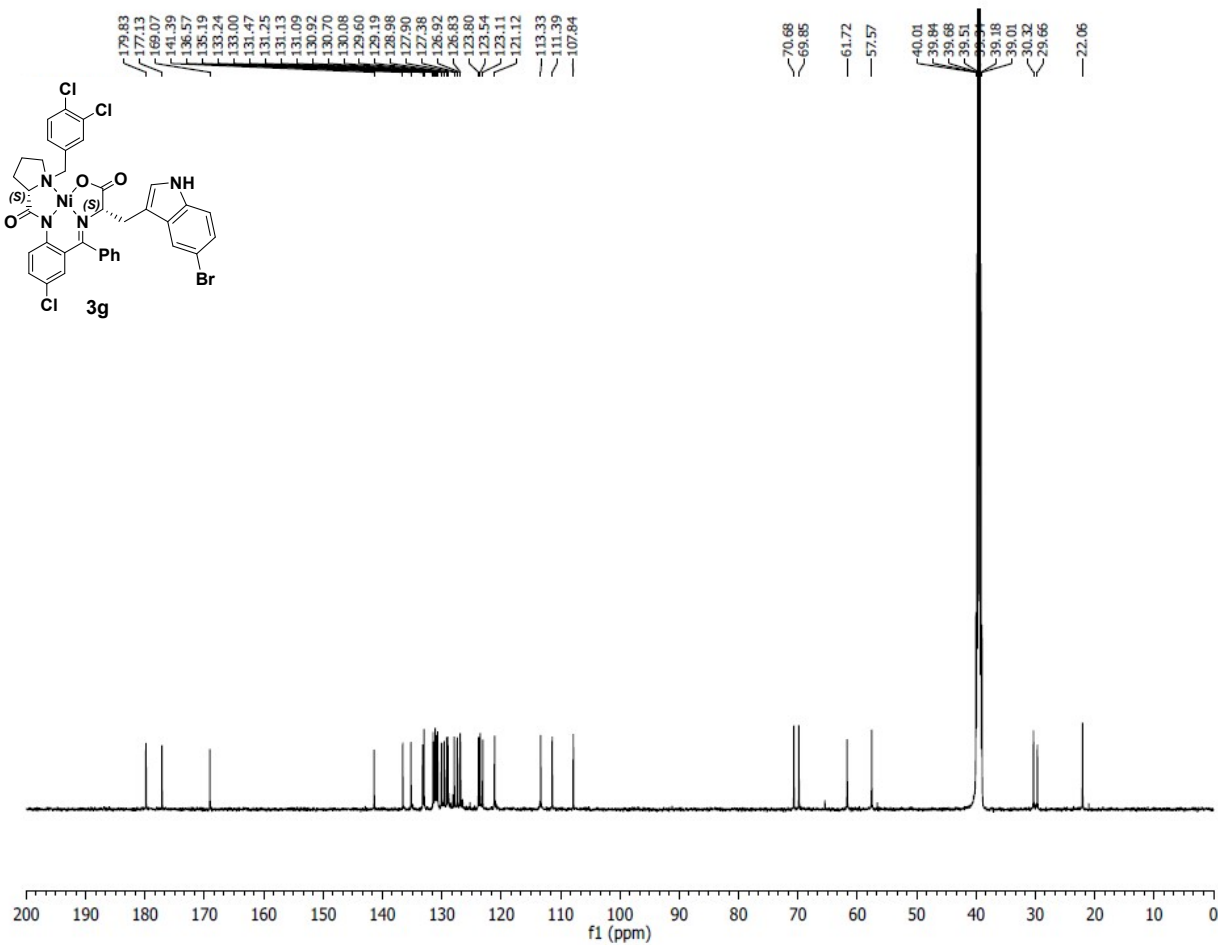





<sup>1</sup>H NMR spectrum of 3i (400 MHz, DMSO-d<sub>6</sub>)

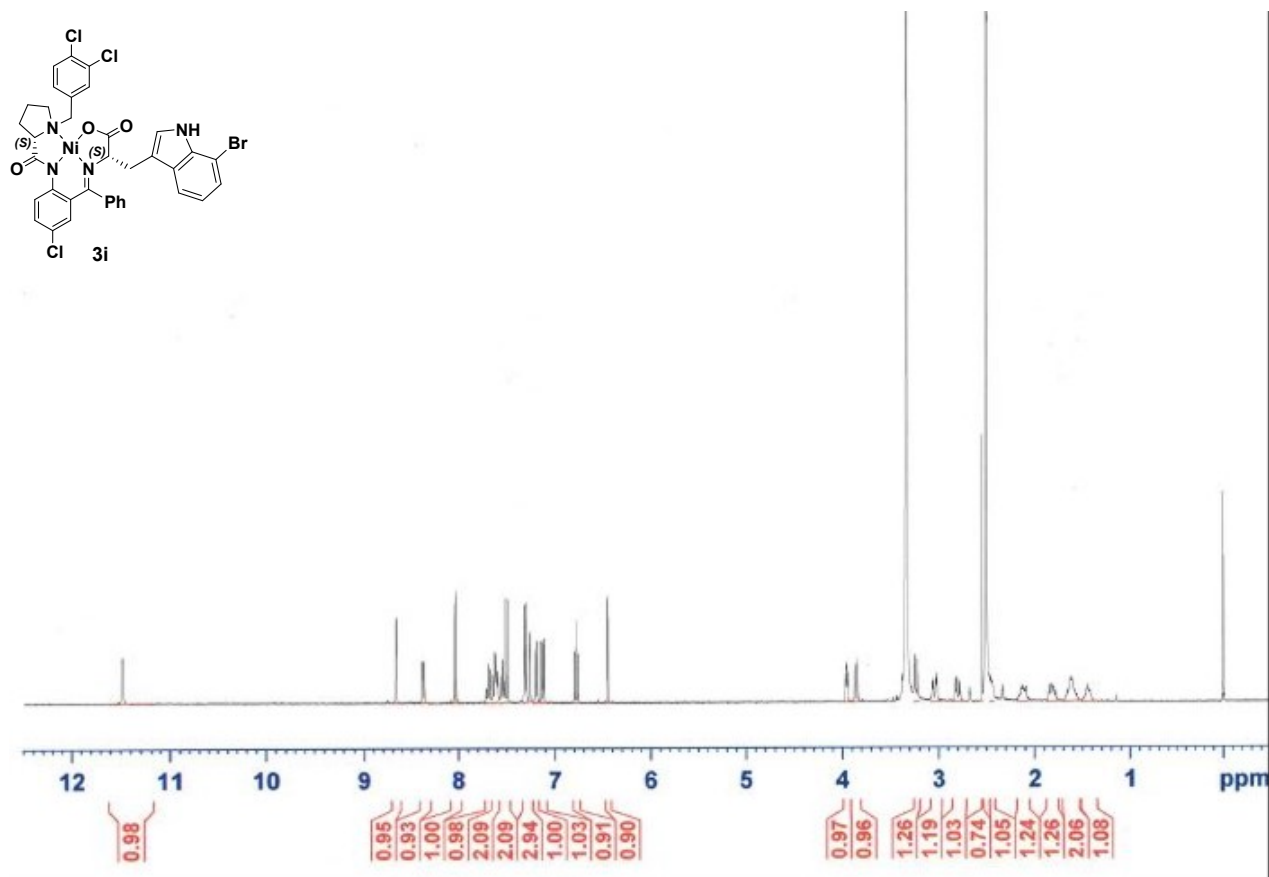

<sup>13</sup>C NMR spectrum of 3i (100 MHz, DMSO-d<sub>6</sub>)

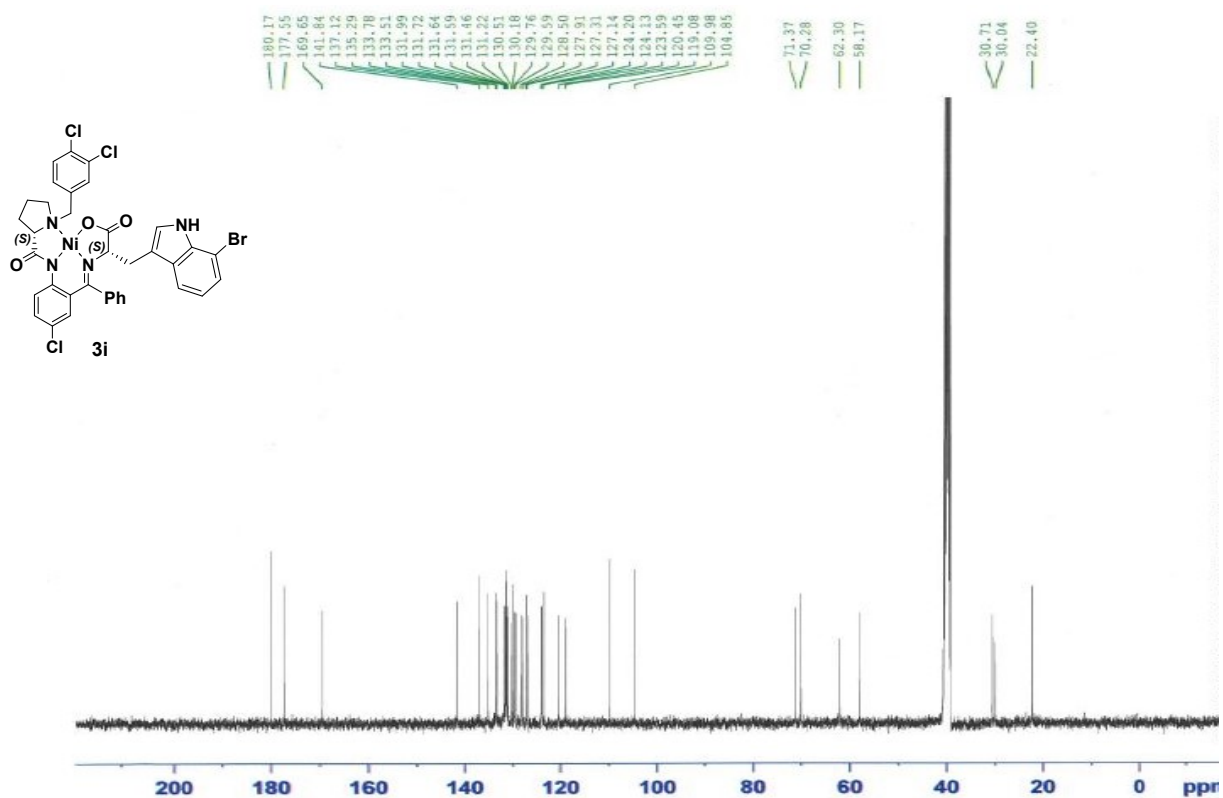

<sup>1</sup>H NMR spectrum of 3j (500 MHz, DMSO-d<sub>6</sub>)

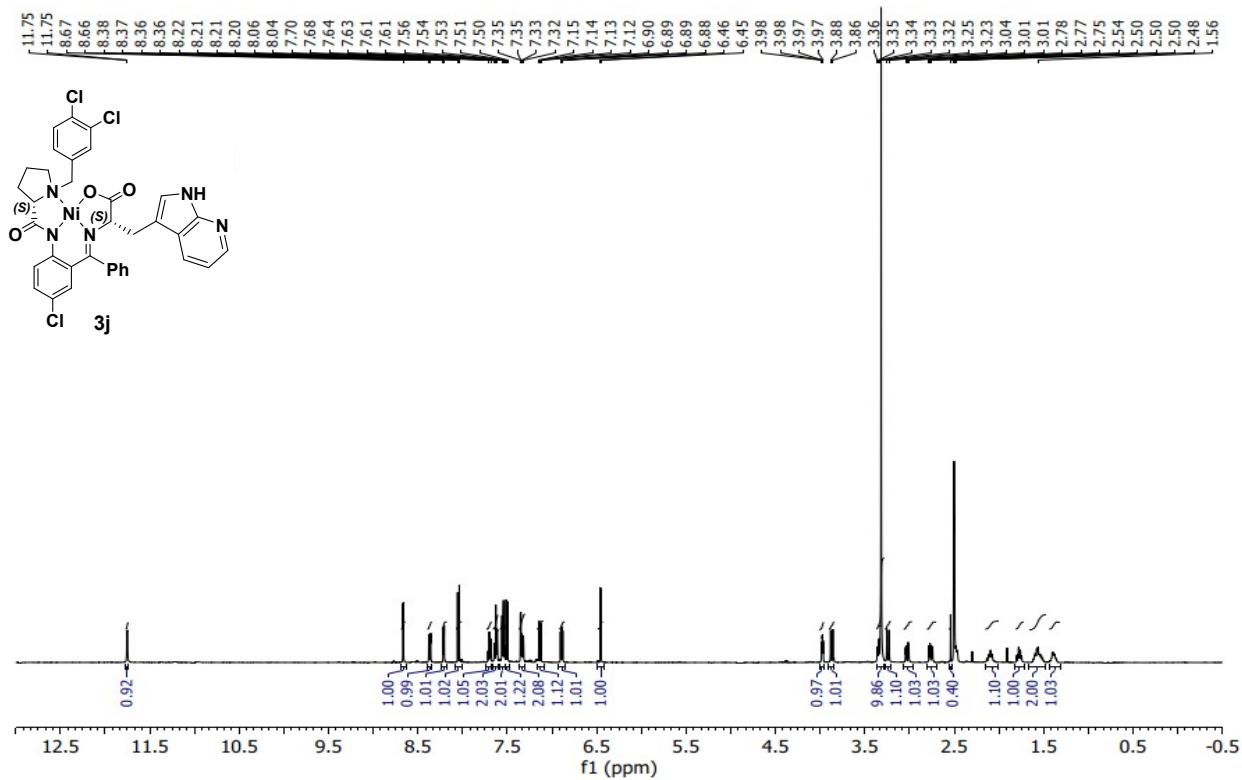

<sup>13</sup>C NMR spectrum of 3j (126 MHz, DMSO-d<sub>6</sub>)

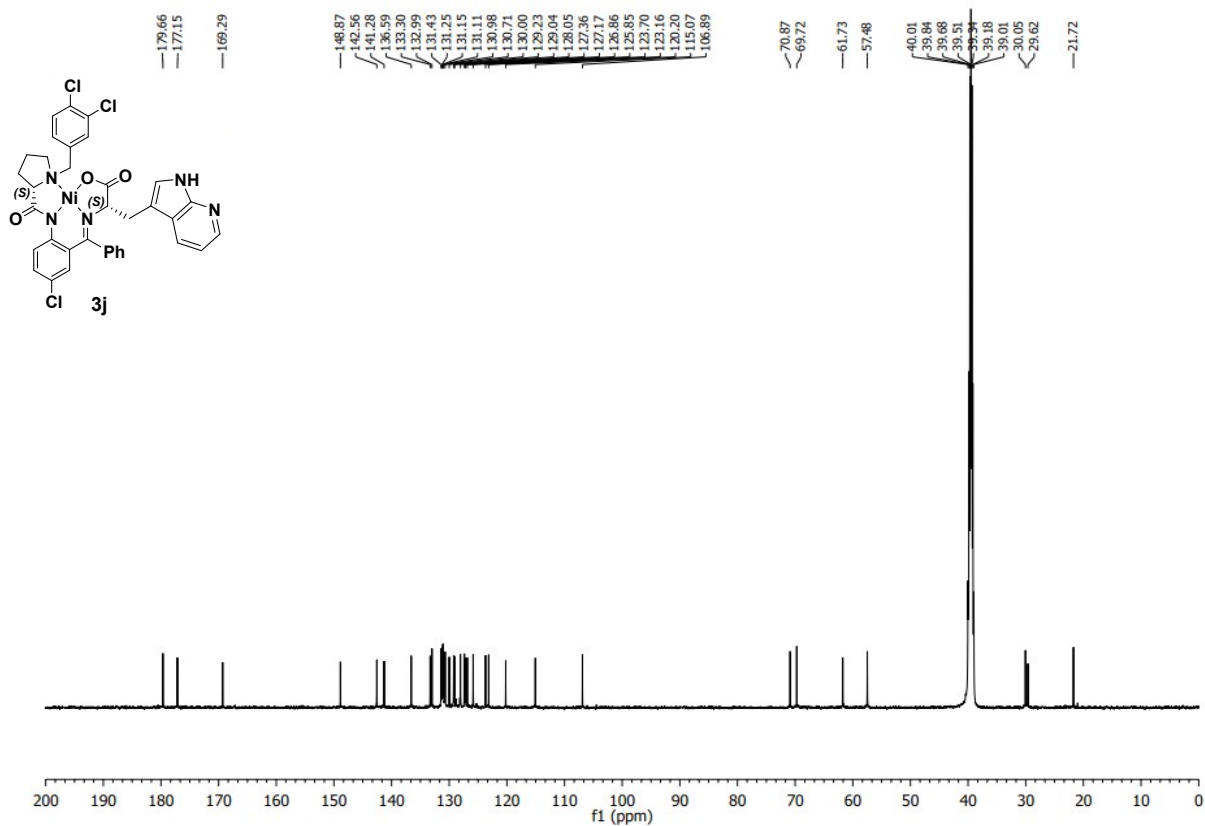

<sup>1</sup>H NMR spectrum of 4h (400 MHz, DMSO-d<sub>6</sub>)

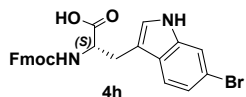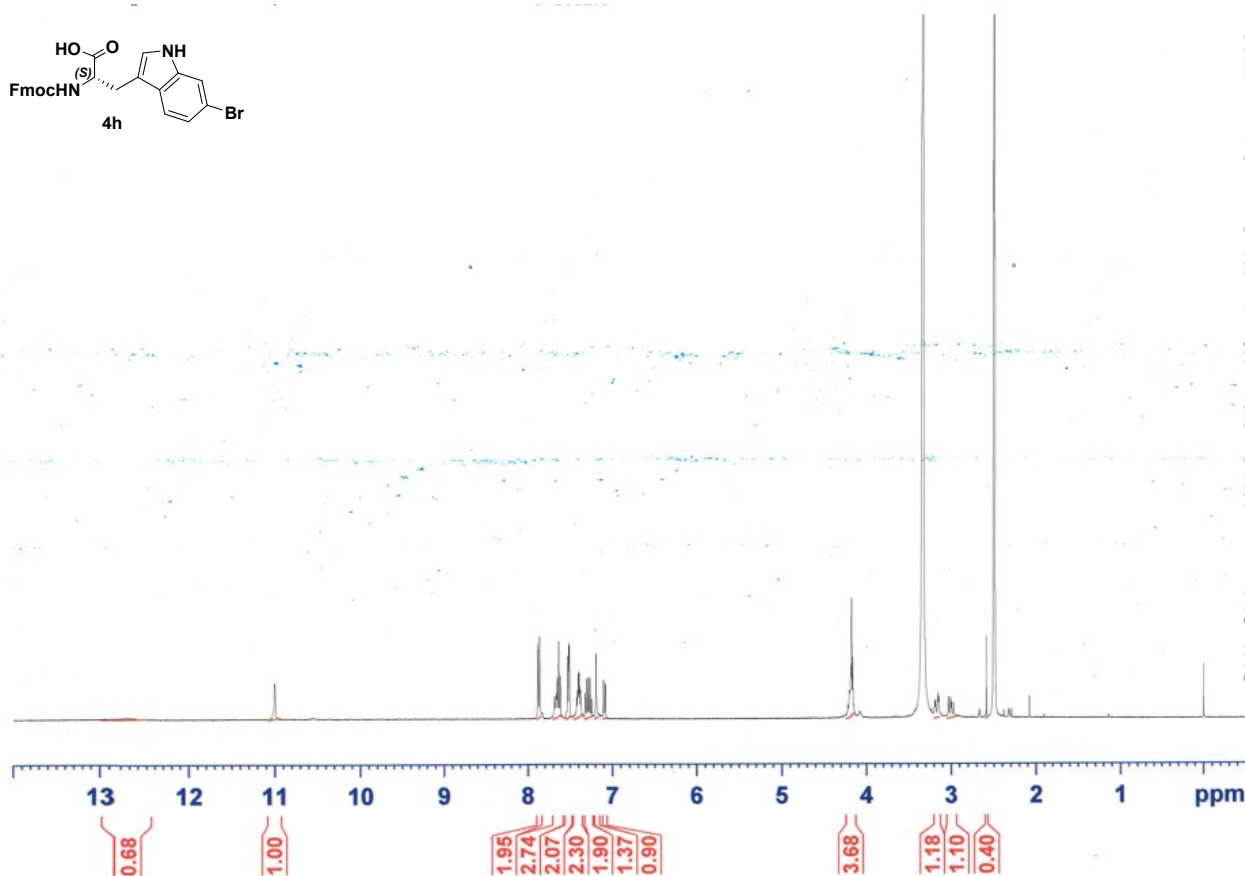

<sup>13</sup>C NMR spectrum of 4h (100 MHz, DMSO-d<sub>6</sub>)

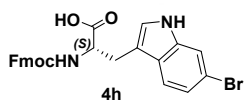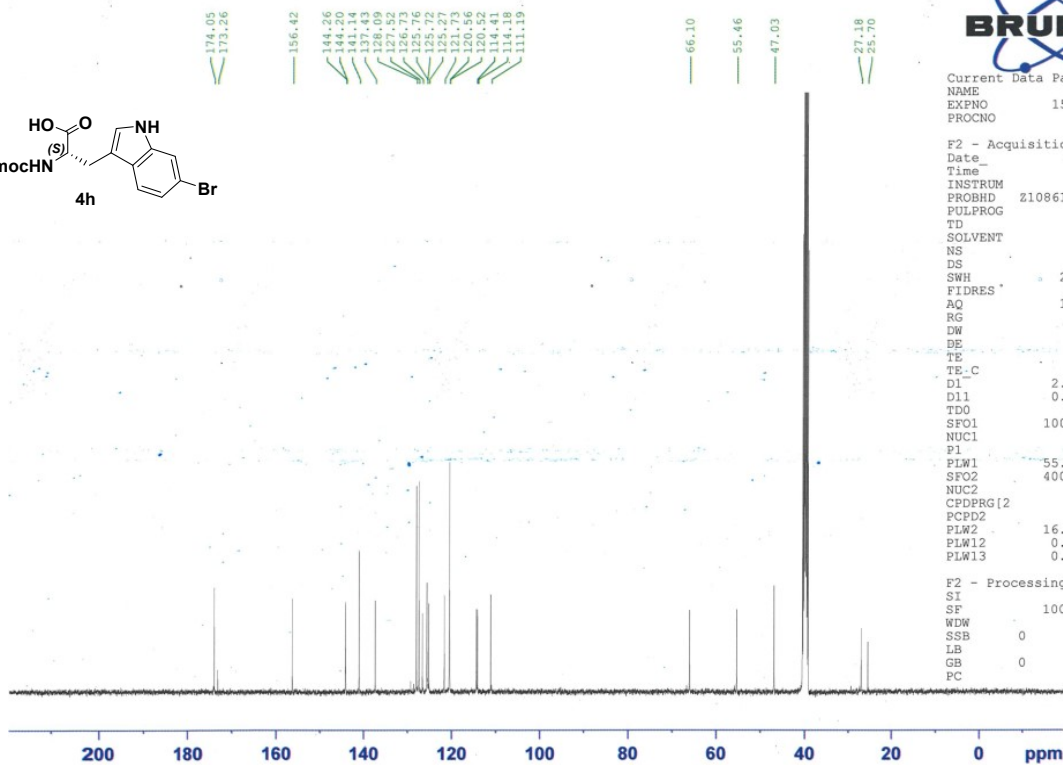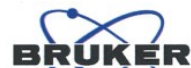

Current Data Parameters  
 NAME SDR  
 EXPNO 1534100110  
 PROCNO 1

F2 - Acquisition Parameters  
 Date 20220830  
 Time 20.57 h  
 INSTRUM spect  
 PROBHD Z108618\_0909 ( )  
 PULPROG zgpg30  
 TD 65536  
 SOLVENT DMSO  
 NS 4096  
 DS 4  
 SWH 24038.461 Hz  
 FIDRES 0.733596 Hz  
 AQ 1.3631488 sec  
 RG 209.13  
 DW 20.800 usec  
 DE 6.50 usec  
 TE 297.4 K  
 TE-C 24.3 deg.  
 D1 2.00000000 sec  
 D11 0.03000000 sec  
 TD0 1  
 SFO1 100.6228298 MHz  
 NUC1 13C  
 P1 10.00 usec  
 PLW1 55.00000000 W  
 SFO2 400.1316005 MHz  
 NUC2 1H  
 CPDPRG2 waltz16  
 PCPD2 90.00 usec  
 PLW2 16.50000000 W  
 PLW12 0.39926001 W  
 PLW13 0.20082000 W

F2 - Processing parameters  
 SI 32768  
 SF 100.6127685 MHz  
 WDW EM  
 SSB 0  
 LB 1.00 Hz  
 GB 0  
 PC 1.40

## HPLC spectra for ee determination of compounds 4a – 4j

### Methods for HPLC analyses (A-G)

#### Method A

Column: Chiral pak IC 5  $\mu$ m, 156 x 4.6 mm, S/N IC00CD-PK013

Eluent: A= 0.1% phosphoric acid in H<sub>2</sub>O, B= 0.1% phosphoric acid in MeCN

Flow rate: 0.4 mL/ min

Temp: 30 °C

Gradient program:

|                    |      |       |       |       |       |       |
|--------------------|------|-------|-------|-------|-------|-------|
| Time (min)         | 0.00 | 15.00 | 20.00 | 23.00 | 23.10 | 30.00 |
| Mobile phase A (%) | 60   | 50    | 0     | 0     | 60    | 60    |
| Mobile phase B (%) | 40   | 50    | 100   | 100   | 40    | 40    |

#### Method B

Column: Chiral pak IC 5  $\mu$ m, 156 x 4.6 mm, S/N IC00CD-PK013

Eluent: A= 0.1% phosphoric acid in H<sub>2</sub>O, B= 0.1% phosphoric acid in MeCN

Flow rate: 0.8 mL/ min

Temp: 30 °C

Gradient program:

|                    |      |       |       |
|--------------------|------|-------|-------|
| Time (min)         | 0.00 | 30.00 | 30.00 |
| Mobile phase A (%) | 82   | 82    | STOP  |
| Mobile phase B (%) | 18   | 18    |       |

#### Method C

Column: Chiral pak IC 5  $\mu$ m, 156 x 4.6 mm, S/N IC00CD-PK013

Eluent: A= 0.1% phosphoric acid in H<sub>2</sub>O, B= 0.1% phosphoric acid in MeCN

Flow rate: 0.5 mL/ min

Temp: 30 °C

Gradient program:

|                    |      |       |       |
|--------------------|------|-------|-------|
| Time (min)         | 0.00 | 30.00 | 30.00 |
| Mobile phase A (%) | 65   | 65    | STOP  |
| Mobile phase B (%) | 35   | 35    |       |

#### Method D

Column: Chiral pak IC 5  $\mu$ m, 156 x 4.6 mm, S/N IC00CD-PK013

Eluent: A= 0.1% phosphoric acid in H<sub>2</sub>O, B= 0.1% phosphoric acid in MeCN

Flow rate: 0.5 mL/ min

Temp: 30 °C

Gradient program:

|                    |      |       |       |
|--------------------|------|-------|-------|
| Time (min)         | 0.00 | 60.00 | 60.00 |
| Mobile phase A (%) | 65   | 65    | STOP  |
| Mobile phase B (%) | 35   | 35    |       |

#### Method E

Column: Chiral pak IB 5  $\mu$ m, 156 x 4.6 mm, S/N IC00CD-PK013

Eluent: A= 0.1% phosphoric acid in H<sub>2</sub>O, B= 0.1% phosphoric acid in MeCN

Flow rate: 0.5 mL/ min

Temp: 30 °C

Gradient program:

|                    |      |       |       |
|--------------------|------|-------|-------|
| Time (min)         | 0.00 | 30.00 | 30.00 |
| Mobile phase A (%) | 53   | 53    | STOP  |
| Mobile phase B (%) | 47   | 47    |       |

**Method F**

Column: Chiral pak IC 5  $\mu\text{m}$ , 156 x 4.6 mm, S/N IC00CD-PK013

Eluent: A= 0.1% phosphoric acid in  $\text{H}_2\text{O}$ , B= 0.1% phosphoric acid in MeCN

Flow rate: 0.8 mL/ min

Temp: 30  $^\circ\text{C}$

Gradient program:

|                    |      |       |       |
|--------------------|------|-------|-------|
| Time (min)         | 0.00 | 30.00 | 30.00 |
| Mobile phase A (%) | 80   | 80    | STOP  |
| Mobile phase B (%) | 20   | 20    |       |

**Method G**

Column: Chiral pak IC 5  $\mu\text{m}$ , 156 x 4.6 mm, S/N IC00CD-PK013

Eluent: A= 0.1% phosphoric acid in  $\text{H}_2\text{O}$ , B= 0.1% phosphoric acid in MeCN

Flow rate: 0.5 mL/ min

Temp: 30  $^\circ\text{C}$

Gradient program:

|                    |      |       |       |
|--------------------|------|-------|-------|
| Time (min)         | 0.00 | 30.00 | 30.00 |
| Mobile phase A (%) | 80   | 80    | STOP  |
| Mobile phase B (%) | 20   | 20    |       |

Mixture of (S) and (R)-4a<sup>30</sup>

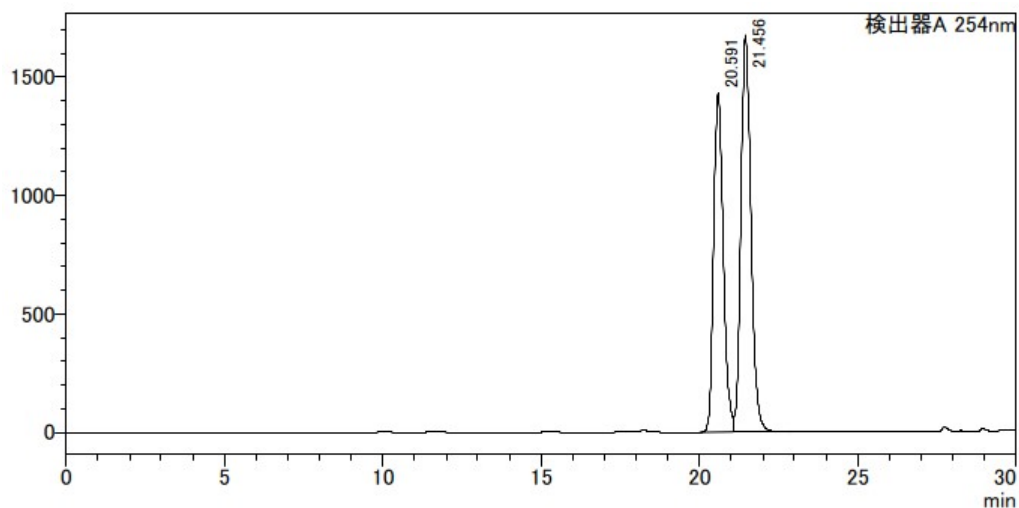

(S)-4a<sup>30</sup>

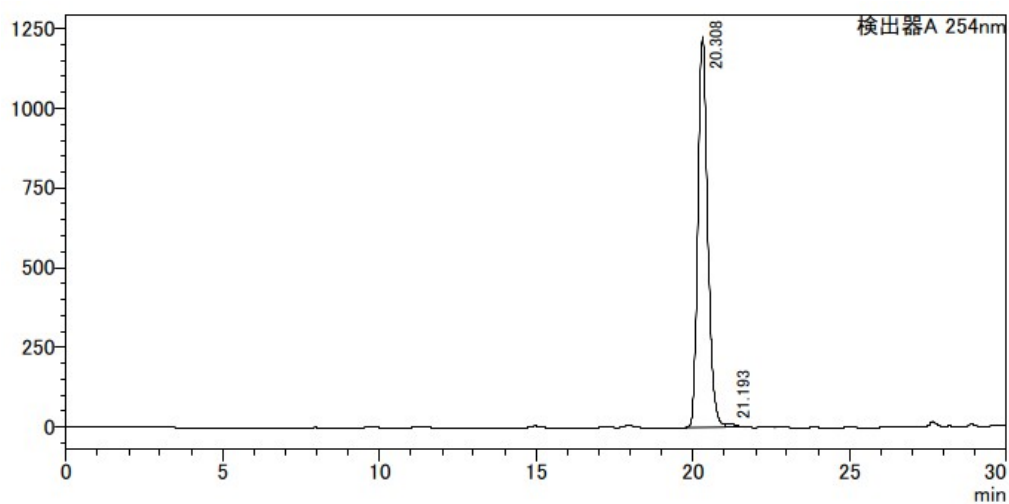

| Peak# | RetTime | Area     | Area%  |
|-------|---------|----------|--------|
| 1     | 20.308  | 26730355 | 99.150 |
| 2     | 21.193  | 229289   | 0.850  |

The ee was determined by an HPLC according to the Method A.

### Mixture of (S) and (R)-4b

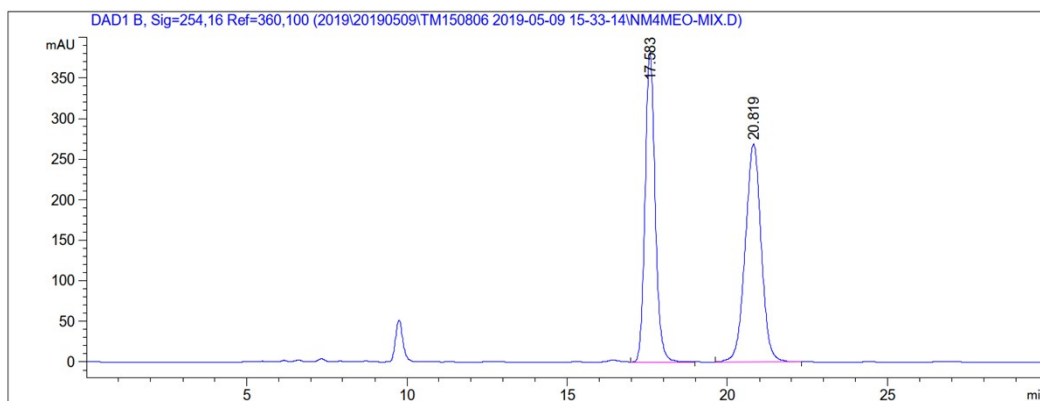

| Peak # | RetTime [min] | Type | Width [min] | Area [mAU*s] | Height [mAU] | Area %  |
|--------|---------------|------|-------------|--------------|--------------|---------|
| 1      | 17.583        | VB   | 0.3384      | 8330.66016   | 381.99365    | 47.1586 |
| 2      | 20.819        | BB   | 0.5416      | 9334.52148   | 268.52713    | 52.8414 |

Totals : 1.76652e4 650.52078

### (S)-4b

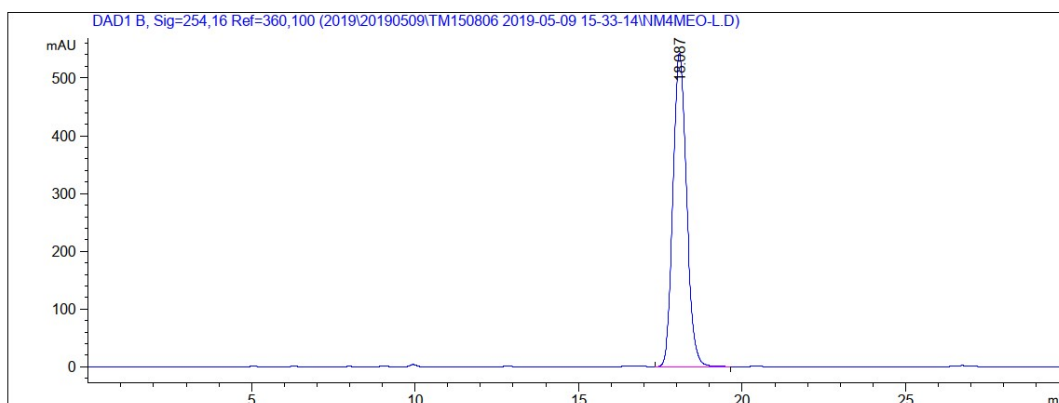

| Peak # | RetTime [min] | Type | Width [min] | Area [mAU*s] | Height [mAU] | Area %   |
|--------|---------------|------|-------------|--------------|--------------|----------|
| 1      | 18.087        | VB   | 0.4540      | 1.57237e4    | 542.77966    | 100.0000 |

Totals : 1.57237e4 542.77966

The ee was determined by an HPLC according to the Method B.

### Mixture of (S) and (R)-4c

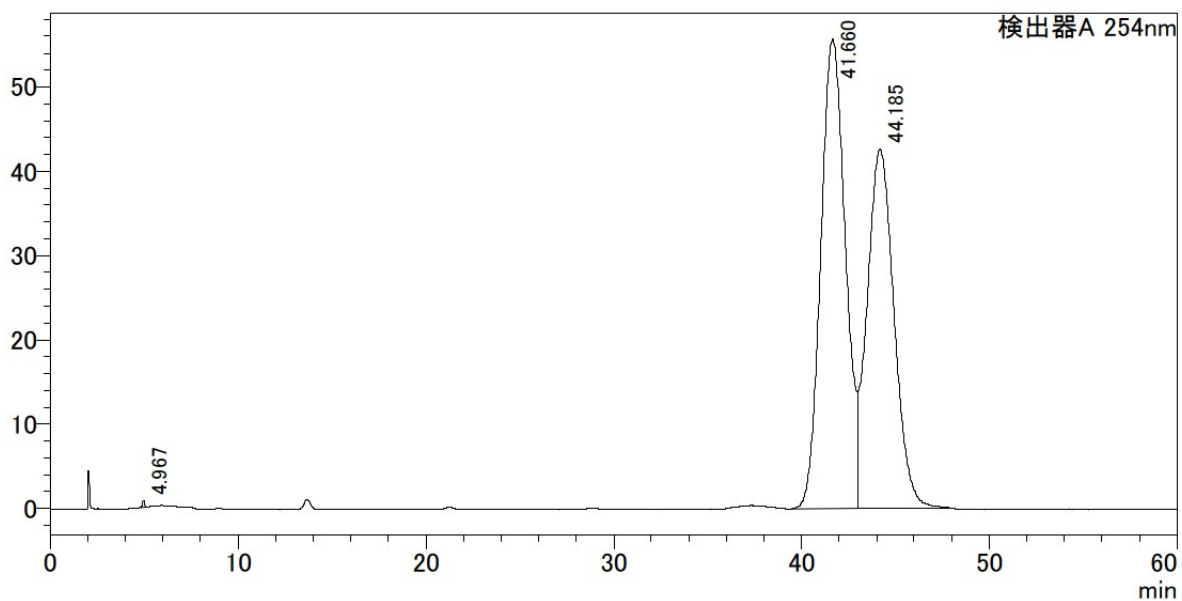

### (S)-4c

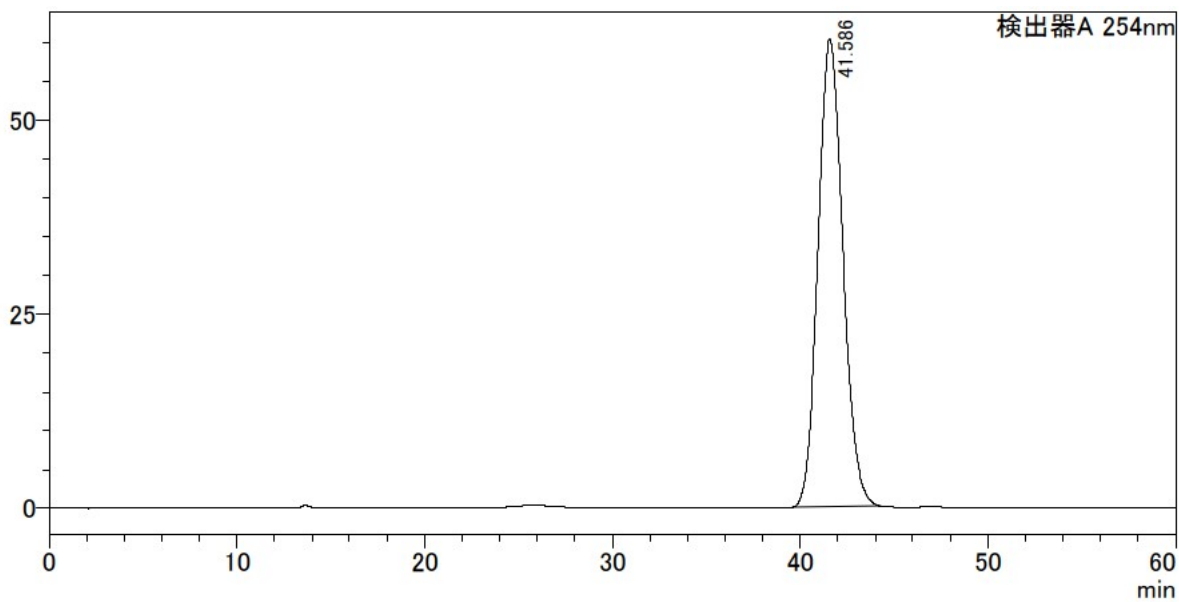

| Peak# | RetTime | Area    | Area%   |
|-------|---------|---------|---------|
| 1     | 41.586  | 5557198 | 100.000 |

The ee was determined by an HPLC according to the Method D



**Mixture of (S) and (R)-4d**

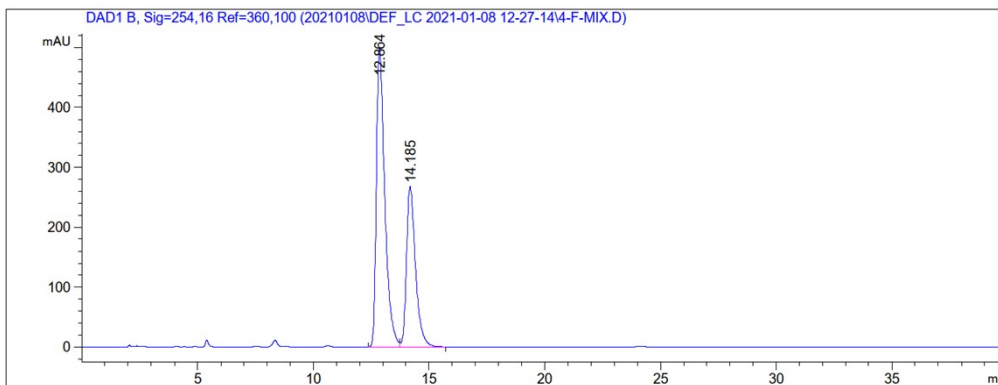

| Peak #   | RetTime [min] | Type | Width [min] | Area [mAU*s] | Height [mAU] | Area %  |
|----------|---------------|------|-------------|--------------|--------------|---------|
| 1        | 12.864        | BV   | 0.3793      | 1.26181e4    | 498.46561    | 63.4863 |
| 2        | 14.185        | VB   | 0.4120      | 7257.19385   | 267.91455    | 36.5137 |
| Totals : |               |      |             | 1.98752e4    | 766.38016    |         |

**(S)-4d**

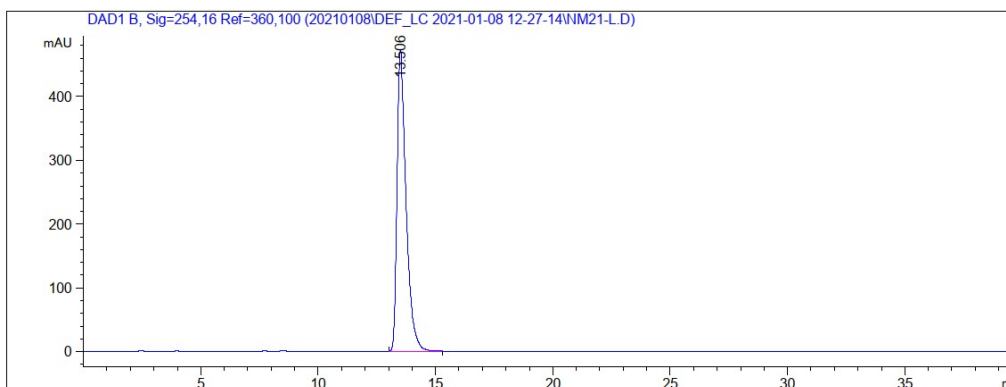

| Peak #   | RetTime [min] | Type | Width [min] | Area [mAU*s] | Height [mAU] | Area %   |
|----------|---------------|------|-------------|--------------|--------------|----------|
| 1        | 13.506        | BB   | 0.4052      | 1.26794e4    | 472.24341    | 100.0000 |
| Totals : |               |      |             | 1.26794e4    | 472.24341    |          |

The ee was determined by an HPLC according to the Method D.

### Mixture of (S) and (R)-4e

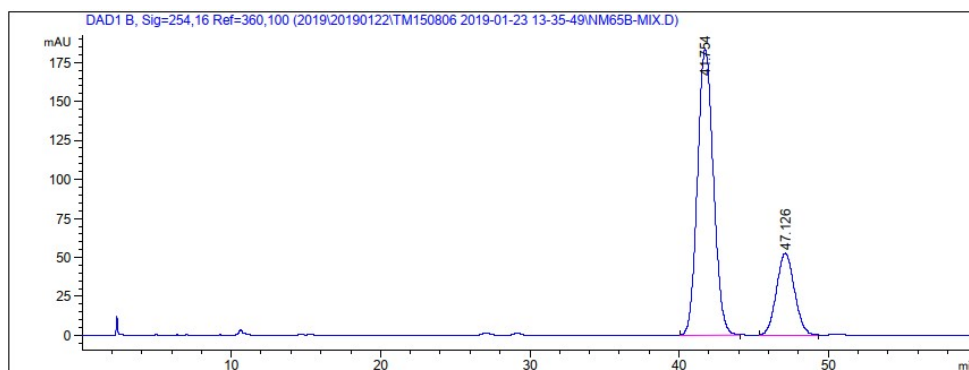

| Peak #   | RetTime [min] | Type | Width [min] | Area [mAU*s] | Height [mAU] | Area %  |
|----------|---------------|------|-------------|--------------|--------------|---------|
| 1        | 41.754        | BB   | 1.1686      | 1.36491e4    | 183.32391    | 75.6859 |
| 2        | 47.126        | BB   | 1.2799      | 4384.79004   | 52.41736     | 24.3141 |
| Totals : |               |      |             | 1.80339e4    | 235.74128    |         |

### (S)-4e

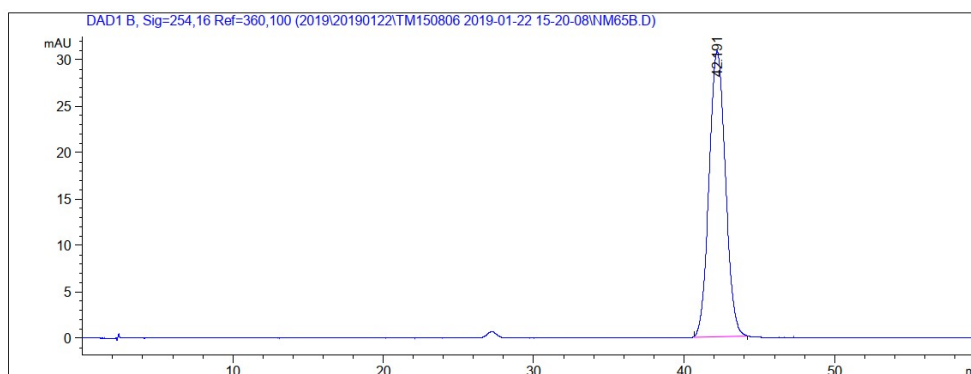

| Peak #   | RetTime [min] | Type | Width [min] | Area [mAU*s] | Height [mAU] | Area %   |
|----------|---------------|------|-------------|--------------|--------------|----------|
| 1        | 42.191        | BB   | 1.1393      | 2325.09595   | 30.84879     | 100.0000 |
| Totals : |               |      |             | 2325.09595   | 30.84879     |          |

The ee was determined by an HPLC according to the Method E.

Mixture of (S) and (R)-4f

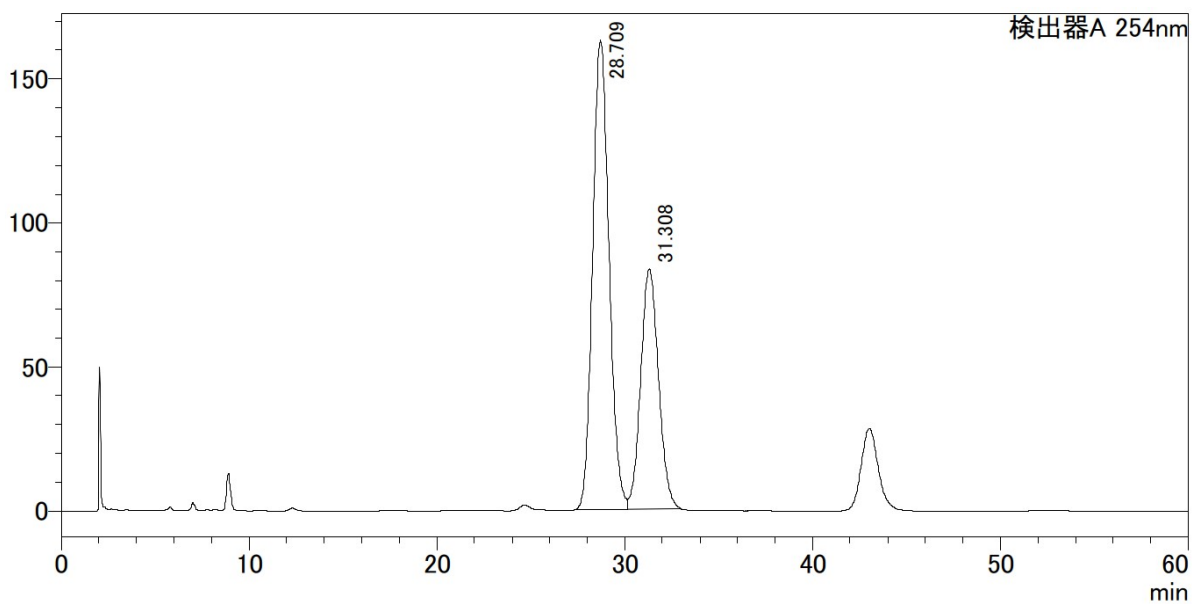

(S)-4f

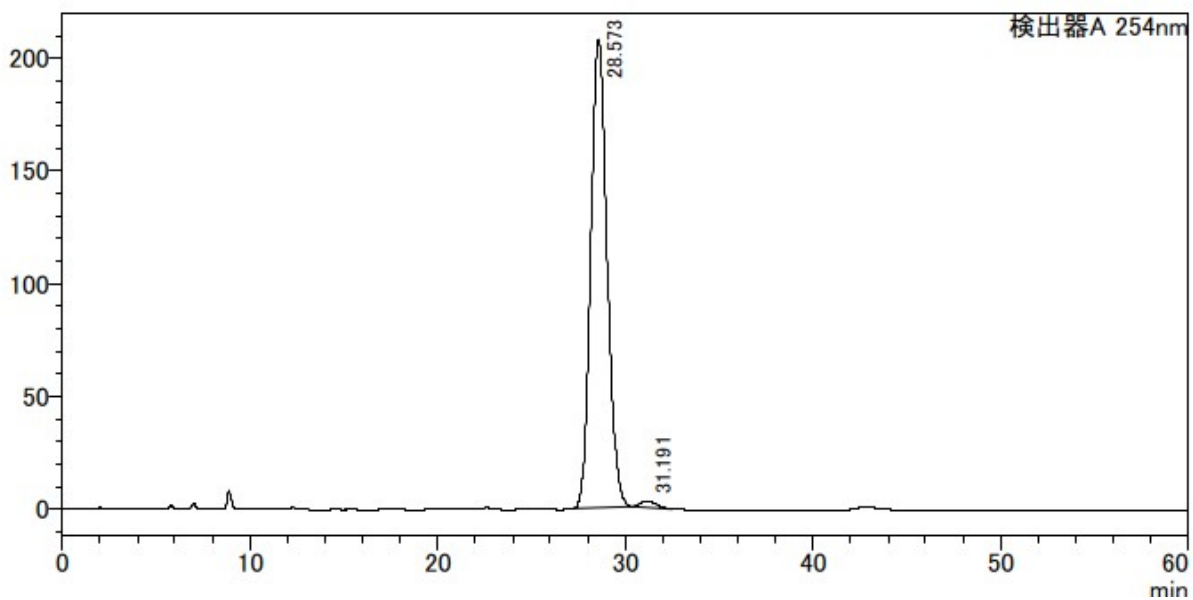

| Peak# | RetTime | Area     | Area%  |
|-------|---------|----------|--------|
| 1     | 28.573  | 12548505 | 98.624 |
| 2     | 31.191  | 175109   | 1.376  |

The ee was determined by an HPLC according to the Method D.

### Mixture of (S) and (R)-4g

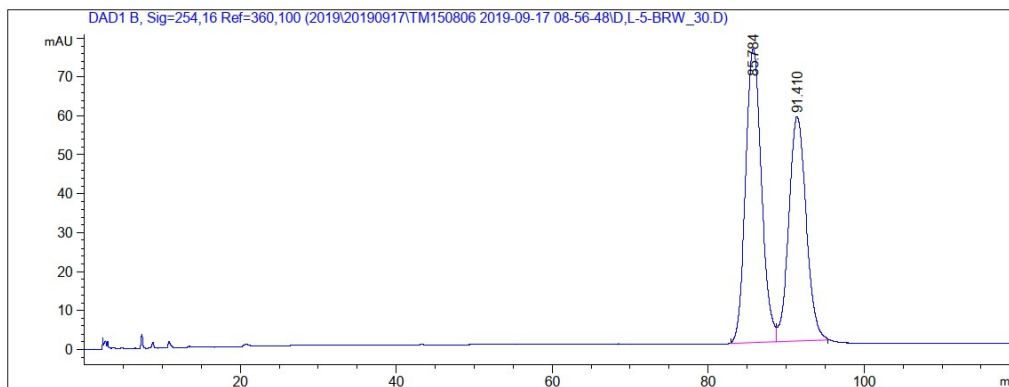

| Peak #   | RetTime [min] | Type | Width [min] | Area [mAU*s] | Height [mAU] | Area %  |
|----------|---------------|------|-------------|--------------|--------------|---------|
| 1        | 85.784        | BV   | 2.1311      | 1.07463e4    | 75.47762     | 54.6429 |
| 2        | 91.410        | VB   | 2.1271      | 8920.12109   | 57.58939     | 45.3571 |
| Totals : |               |      |             | 1.96664e4    | 133.06701    |         |

### (S)-4g

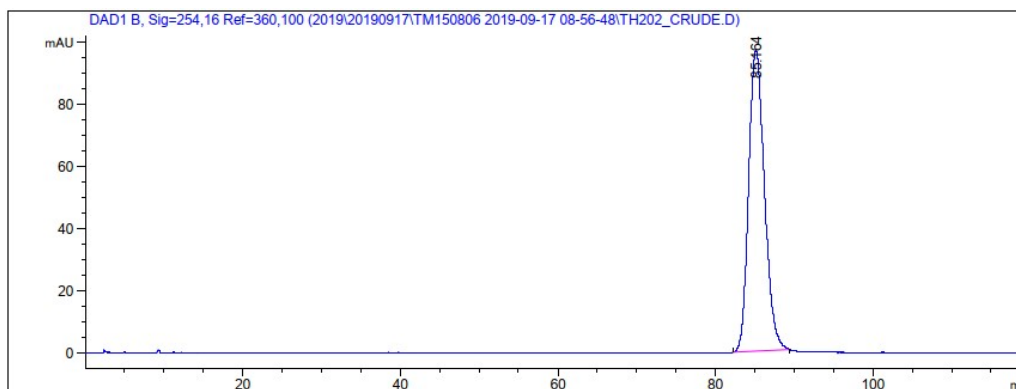

| Peak #   | RetTime [min] | Type | Width [min] | Area [mAU*s] | Height [mAU] | Area %   |
|----------|---------------|------|-------------|--------------|--------------|----------|
| 1        | 85.164        | BB   | 2.0604      | 1.35437e4    | 96.67652     | 100.0000 |
| Totals : |               |      |             | 1.35437e4    | 96.67652     |          |

The ee was determined by an HPLC according to the Method F.

### Mixture of (S) and (R)-4h

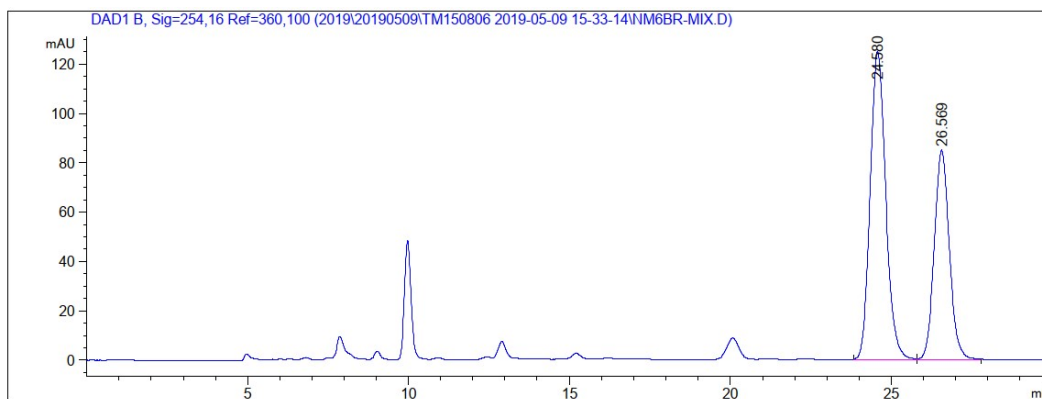

| Peak # | RetTime [min] | Type | Width [min] | Area [mAU*s] | Height [mAU] | Area %  |
|--------|---------------|------|-------------|--------------|--------------|---------|
| 1      | 24.580        | BV   | 0.5247      | 4203.69727   | 124.89906    | 60.3451 |
| 2      | 26.569        | VB   | 0.4996      | 2762.39331   | 84.89160     | 39.6549 |

Totals : 6966.09058 209.79066

### (S)-4h

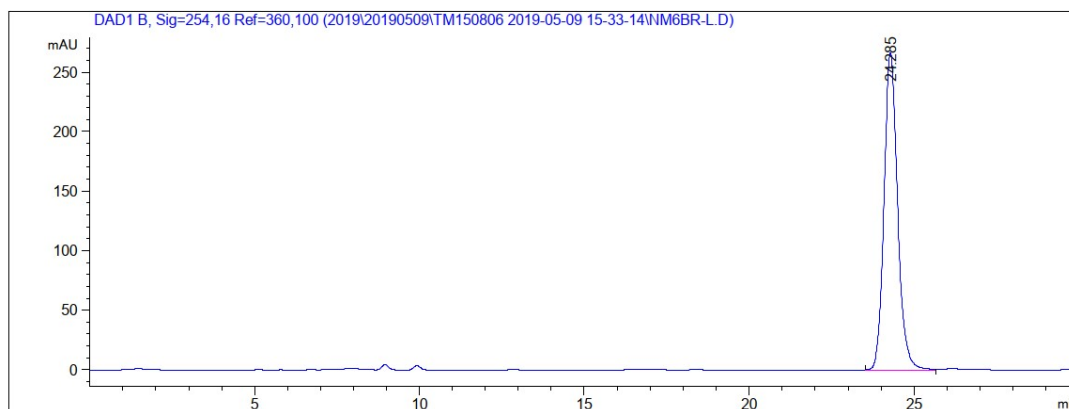

| Peak # | RetTime [min] | Type | Width [min] | Area [mAU*s] | Height [mAU] | Area %   |
|--------|---------------|------|-------------|--------------|--------------|----------|
| 1      | 24.285        | BB   | 0.4436      | 7620.62012   | 266.51480    | 100.0000 |

Totals : 7620.62012 266.51480

The ee was determined by an HPLC according to the Method G.

**Mixture of (S) and (R)-4i**

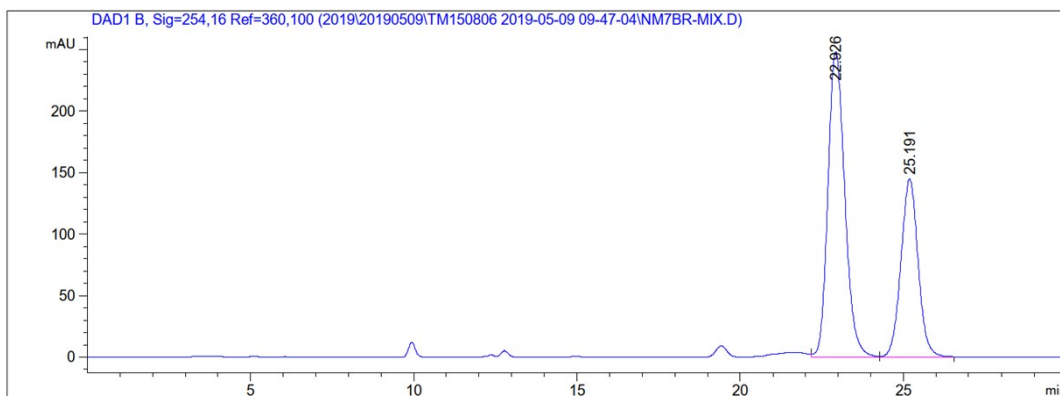

| Peak #   | RetTime [min] | Type | Width [min] | Area [mAU*s] | Height [mAU] | Area %  |
|----------|---------------|------|-------------|--------------|--------------|---------|
| 1        | 22.926        | VV   | 0.5544      | 8920.86914   | 248.73927    | 62.7605 |
| 2        | 25.191        | VB   | 0.5662      | 5293.27881   | 144.89851    | 37.2395 |
| Totals : |               |      |             | 1.42141e4    | 393.63779    |         |

**(S)-4i**

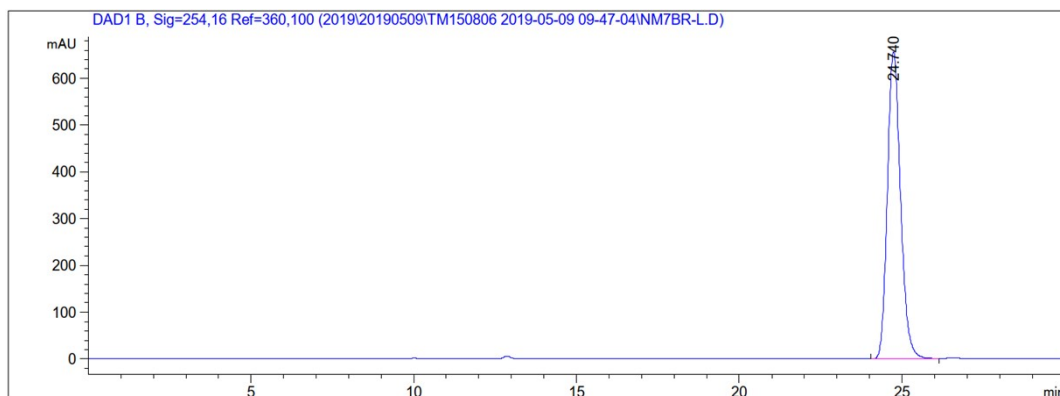

| Peak #   | RetTime [min] | Type | Width [min] | Area [mAU*s] | Height [mAU] | Area %   |
|----------|---------------|------|-------------|--------------|--------------|----------|
| 1        | 24.740        | BB   | 0.4303      | 1.84863e4    | 656.92871    | 100.0000 |
| Totals : |               |      |             | 1.84863e4    | 656.92871    |          |

The ee was determined by an HPLC according to the Method B.

### Mixture of (S) and (R)-4j

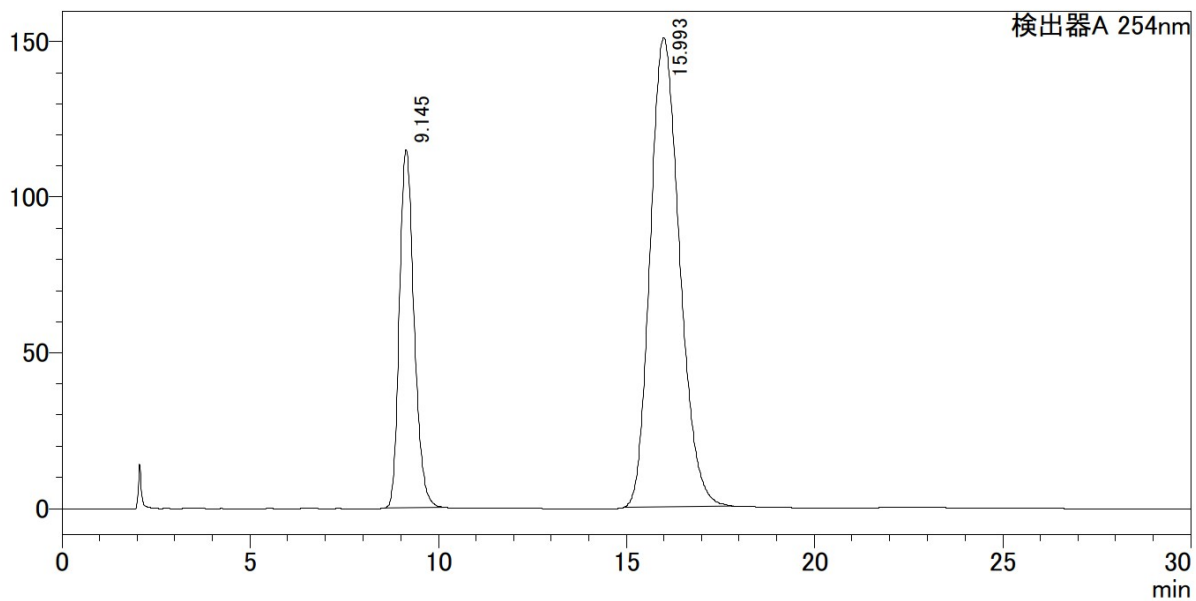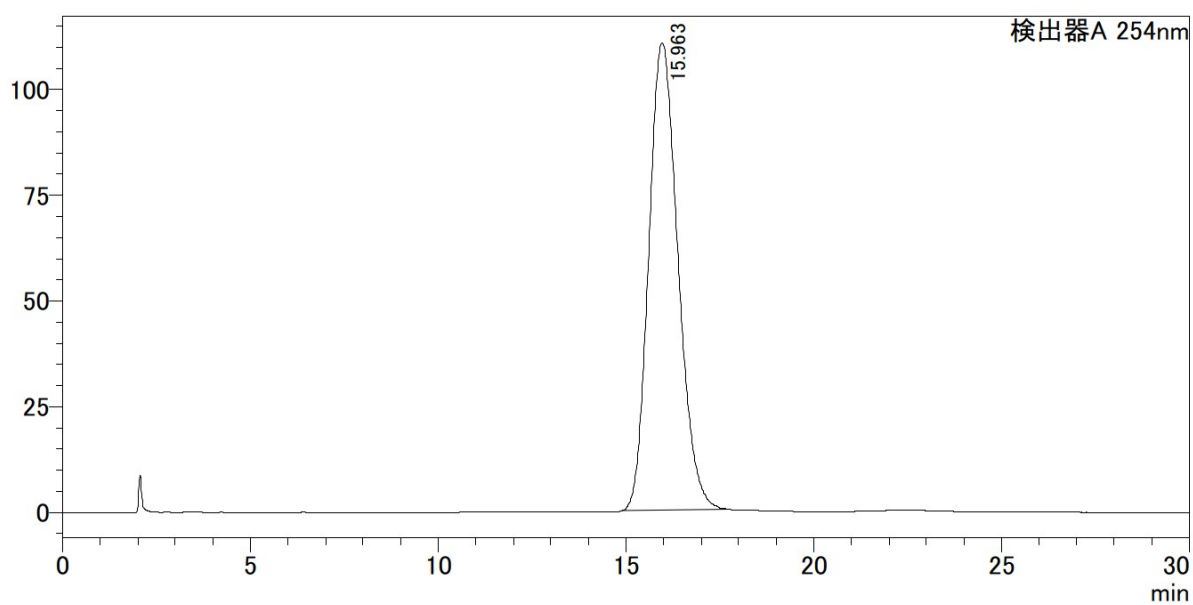

| Peak# | RetTime | Area    | Area%   |
|-------|---------|---------|---------|
| 1     | 15.963  | 5978423 | 100.000 |

The ee was determined by an HPLC according to the Method C.

Details of the continuous-flow reaction system in Table 5

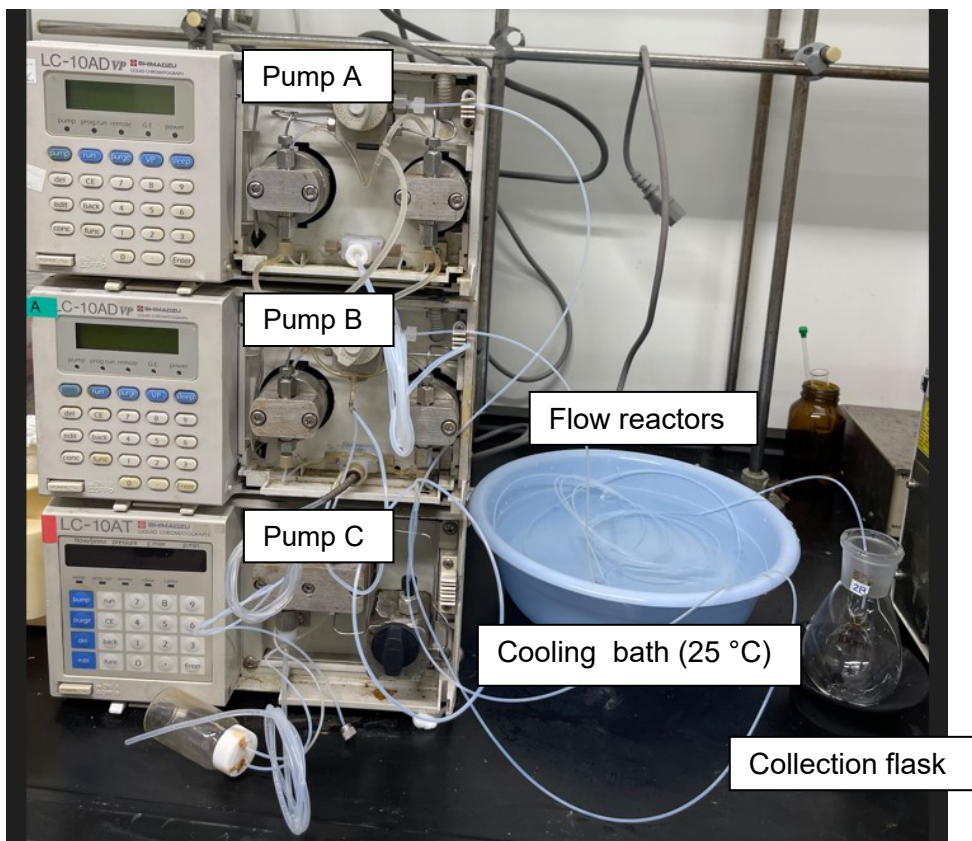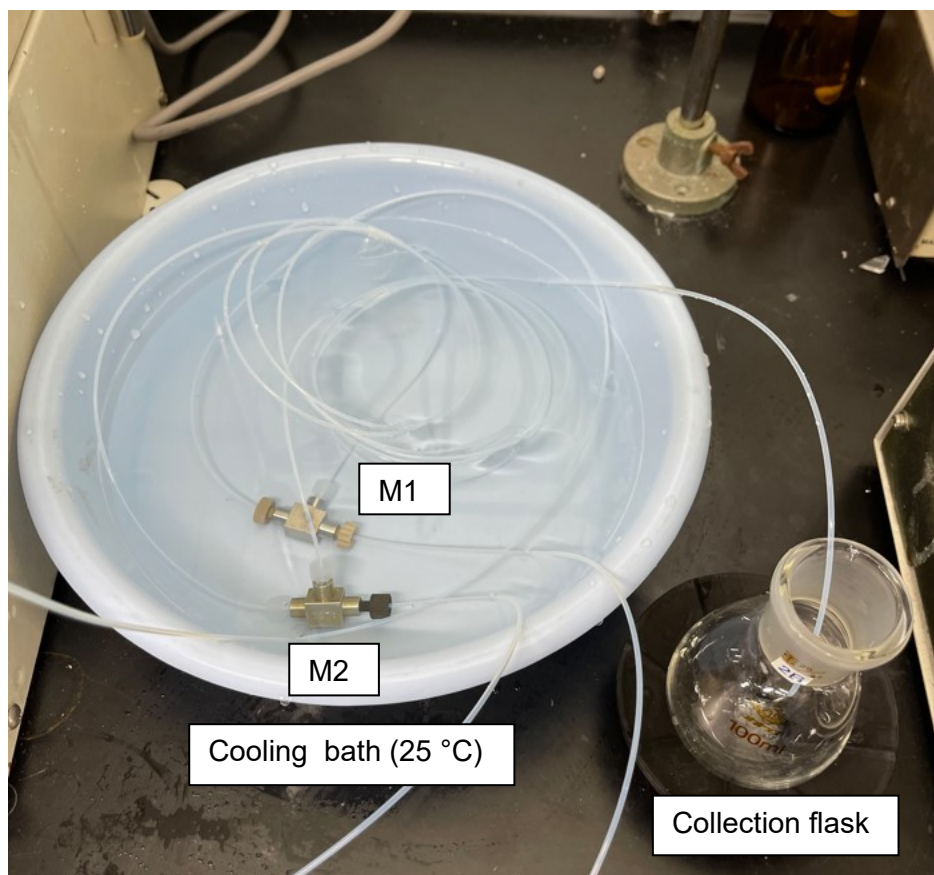



Details of the continuous-flow reaction system in Table 6

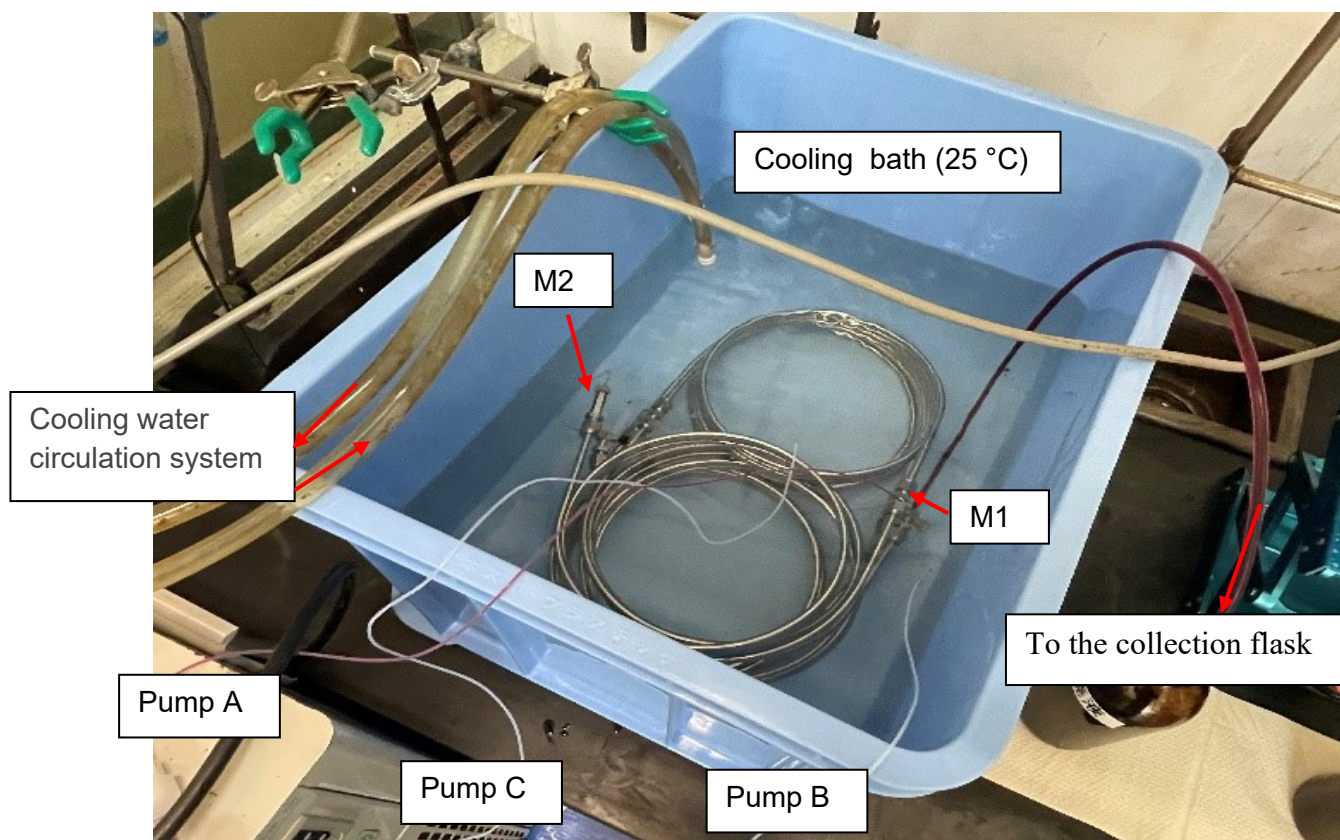

Supplement: d2ob01682f1.pdf [file d2ob01682f1.pdf]
